# Supplementary material for: Selecting dual atomic clusters supported on two-dimensional biphenylene with significantly optimized capability to reduce carbon monoxide
Source: Royal Society of Chemistry journal article supplement (doi:10.1039/d3ta06525a), 2023-12-06
Supplement: d3ta06525a1.pdf [file d3ta06525a1.pdf]

**Selecting Dual Atomic Clusters Supported on Two-dimensional  
Biphenylene Significant Optimization of Capability to Reduce  
Carbon Monoxide**

Zhongwei Wang,<sup>ab</sup> Zhili Yin,<sup>a</sup> Yan Gao,<sup>\*a</sup> Haifeng Wang,<sup>\*a</sup> Junfeng Gao<sup>\*ab</sup> and Jijun Zhao<sup>b</sup>

*<sup>a</sup>College of Sciences/Xinjiang Production & Construction Corps Key Laboratory of Advanced  
Energy Storage Materials and Technologies, Shihezi University, Shihezi 832000, China*

*<sup>b</sup>Key Laboratory of Materials Modification by Laser, Ion and Electron Beams (Dalian  
University of Technology), Ministry of Education, Dalian 116024, China*

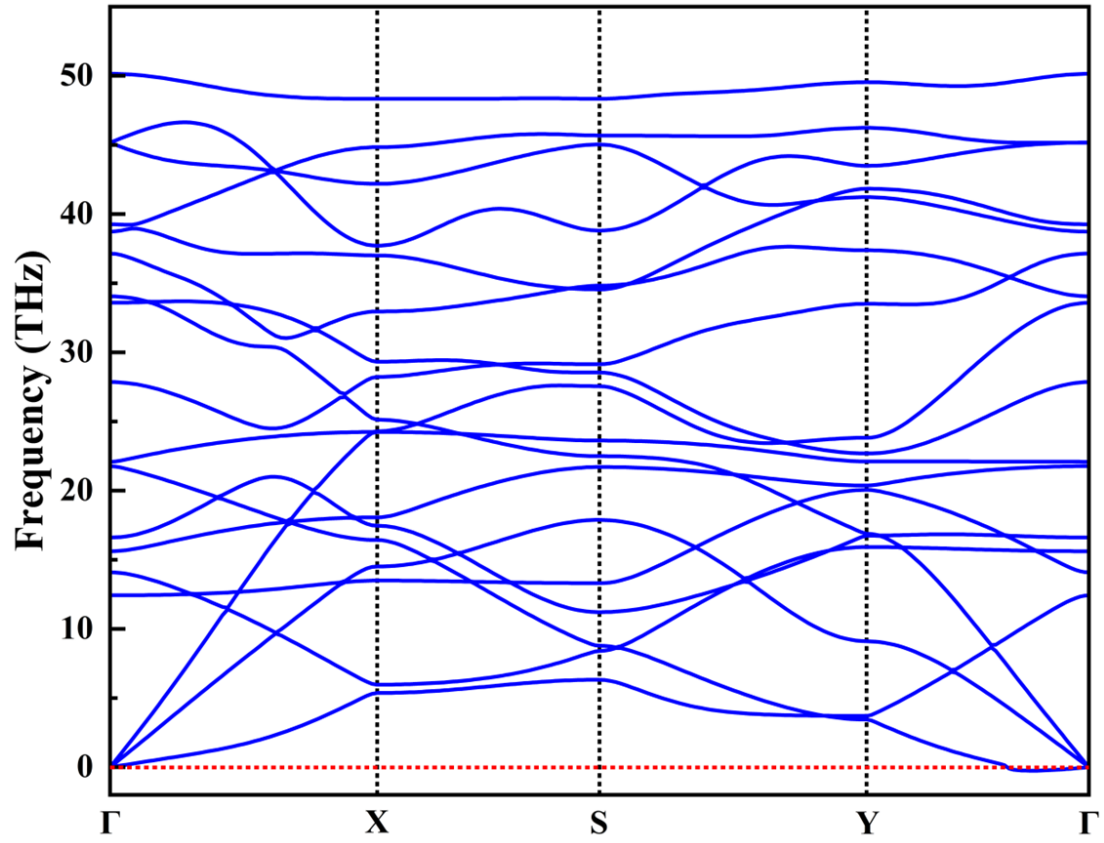

Fig. S1. Phonon dispersion spectrum of the BPN.

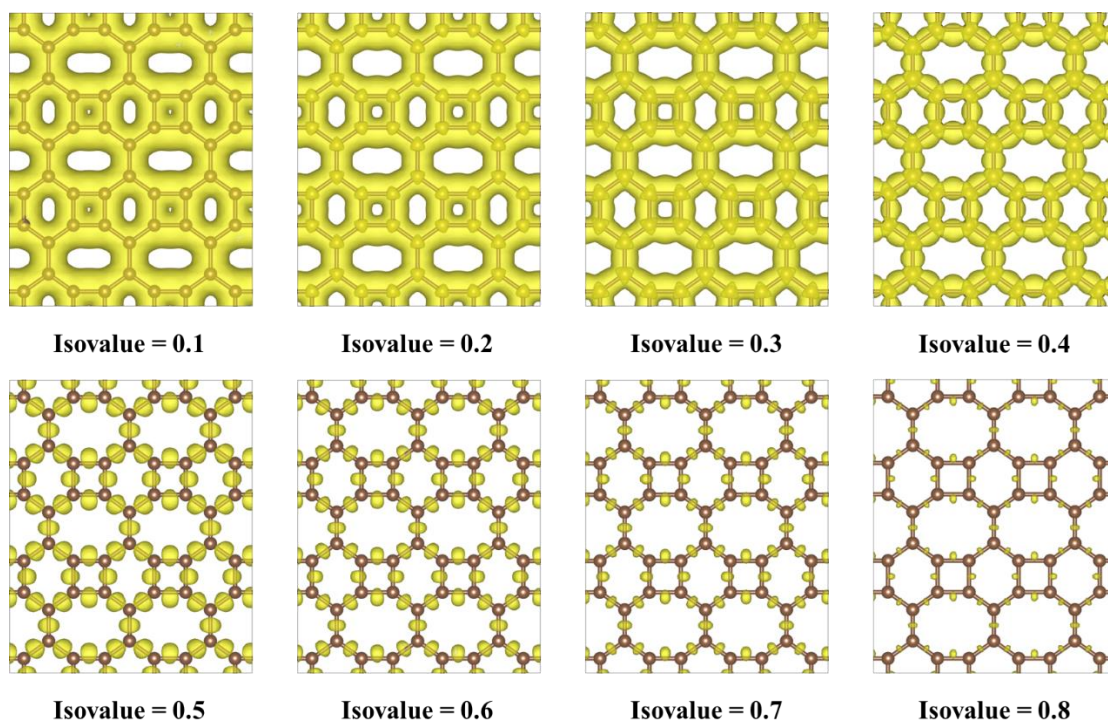

**Fig. S2.** Isosurfaces of electron localization function of the BPN.

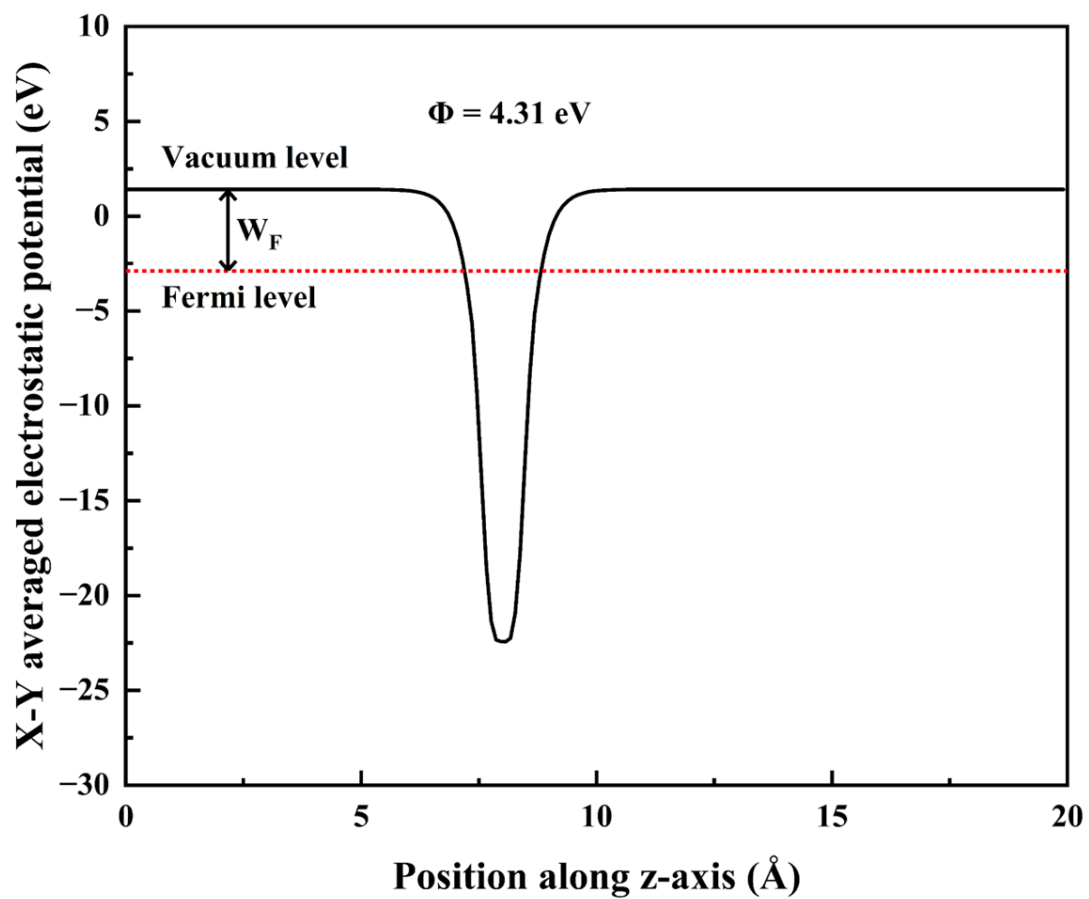

Fig. S3. The electrostatic potential along the z-axis direction.

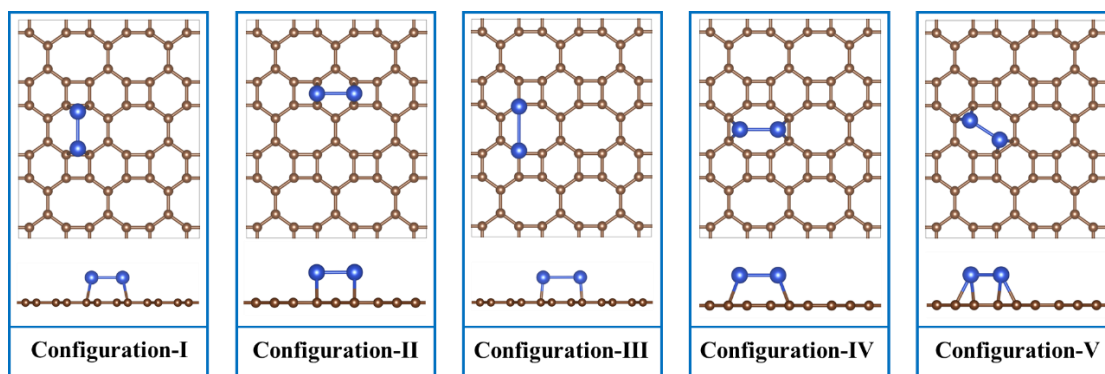

**Fig. S4.** Five different types of diatomic configurations in BPN.

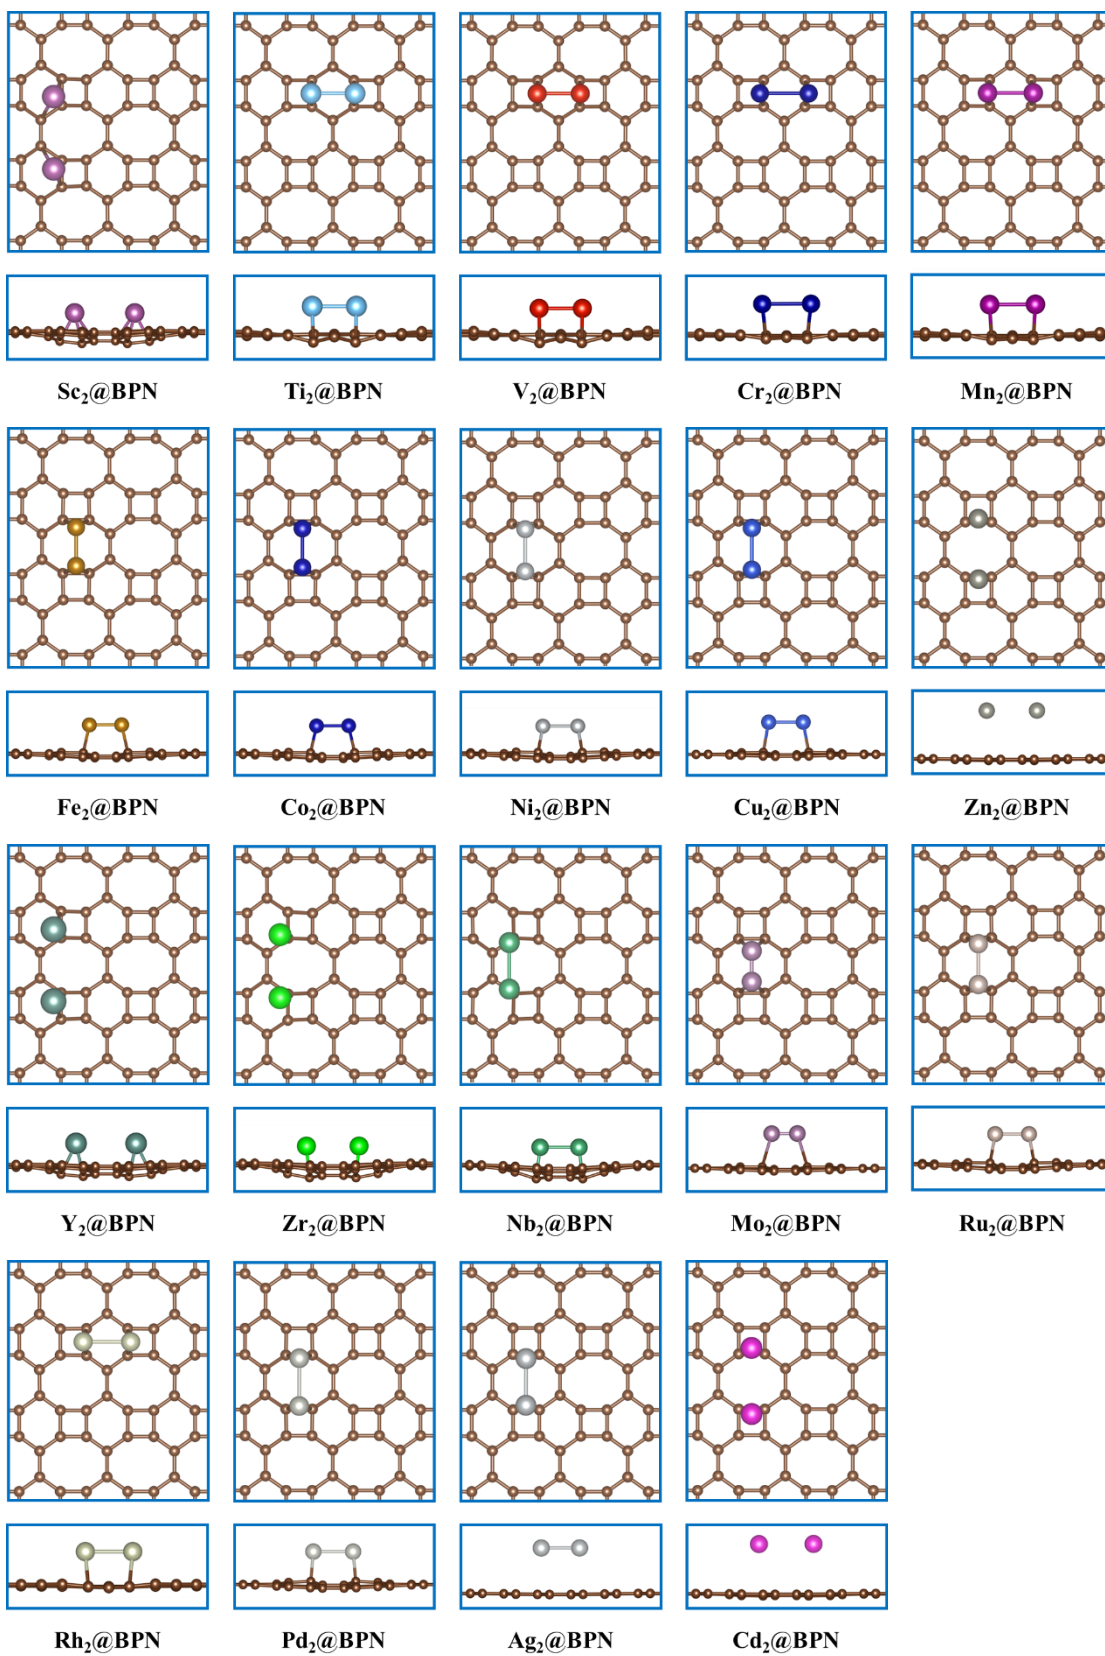

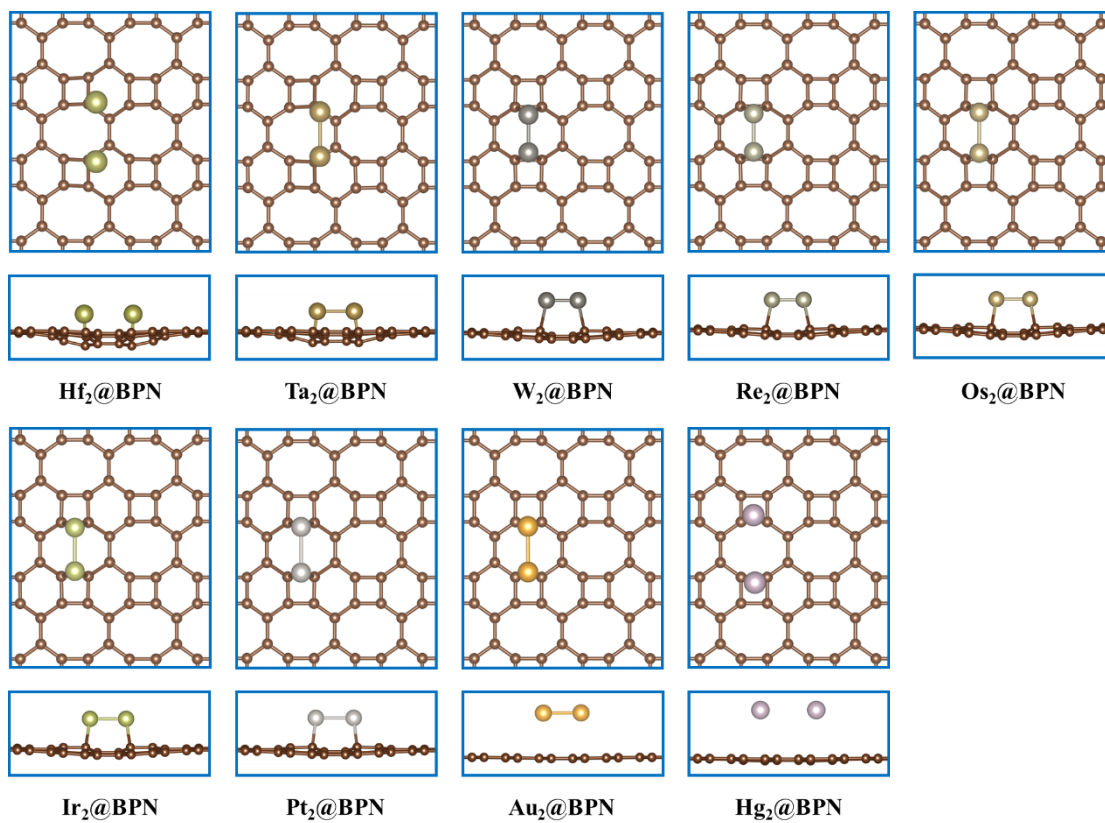

**Fig. S5.** Optimal adsorption conformations of 3d, 4d, and 5d transition metal diatoms.

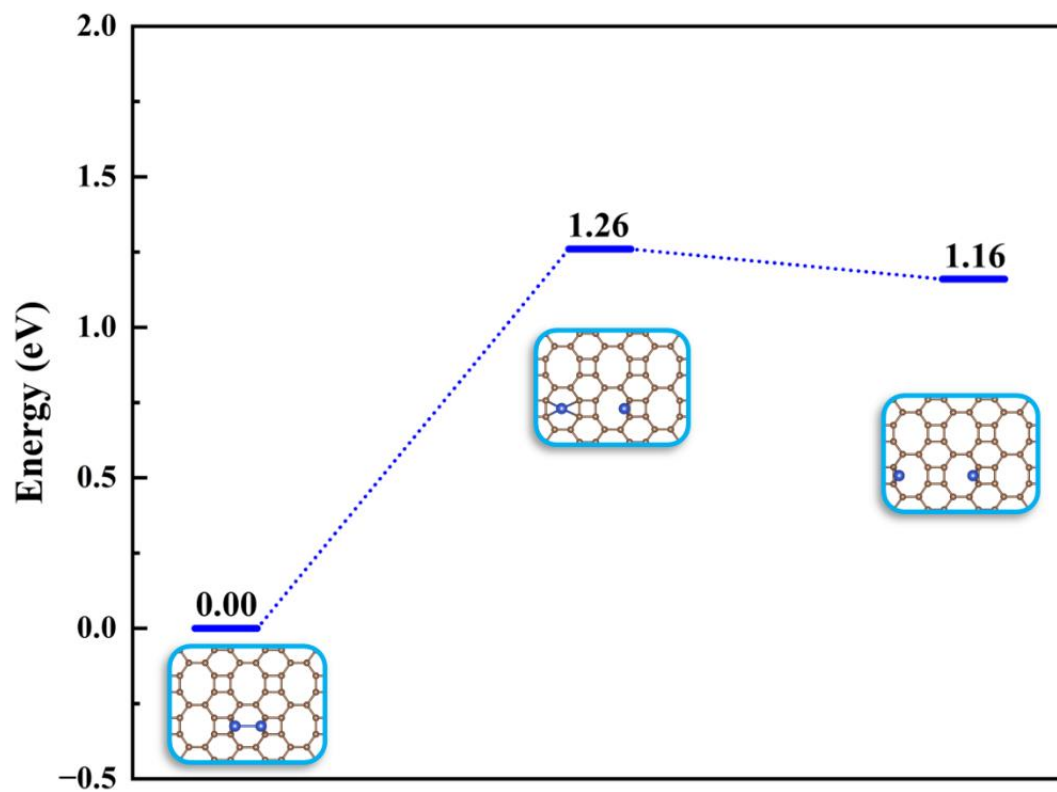

**Fig. S6.** The calculated migration barrier for Cu.



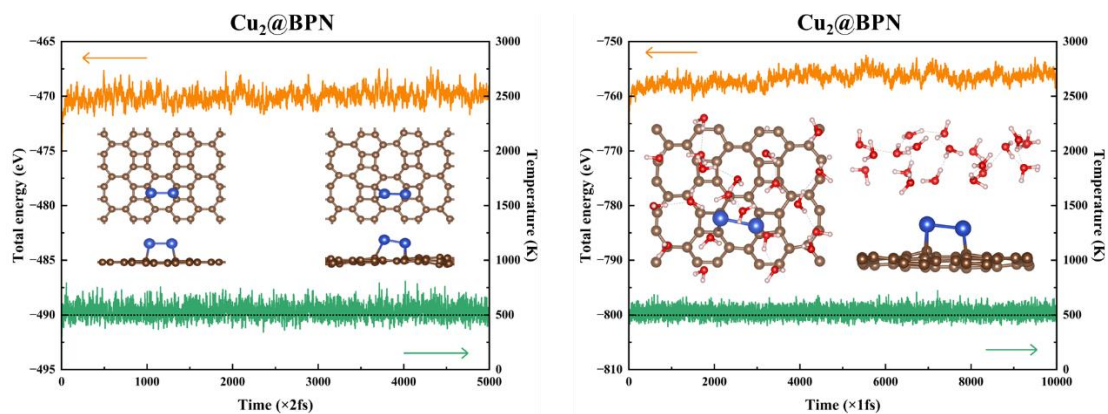

**Fig. S7.** AIMD simulations of  $\text{Cu}_2\text{BPN}$  were carried out at 500 K over a total time step of 10 ps, using both vacuum conditions and an explicit solvent model to simulate aqueous solution conditions. The green and yellow parts in the figure represent temperature and energy, respectively.

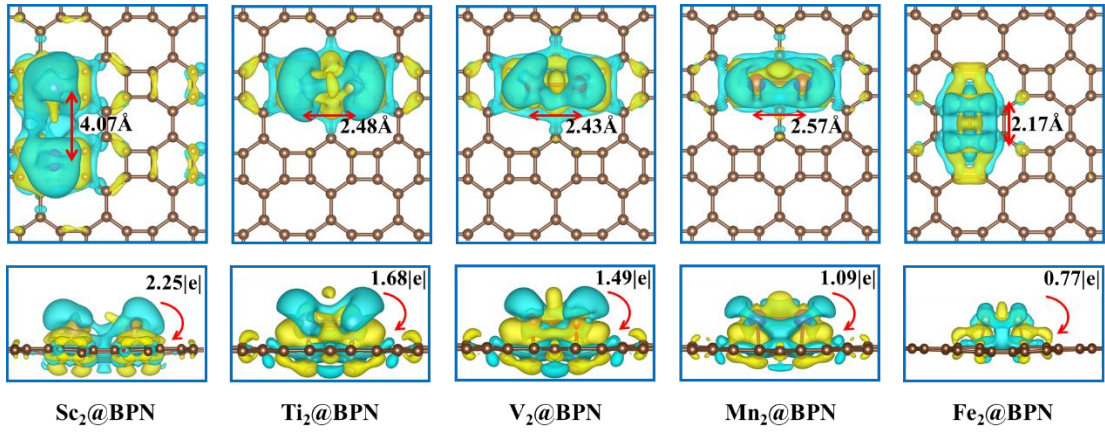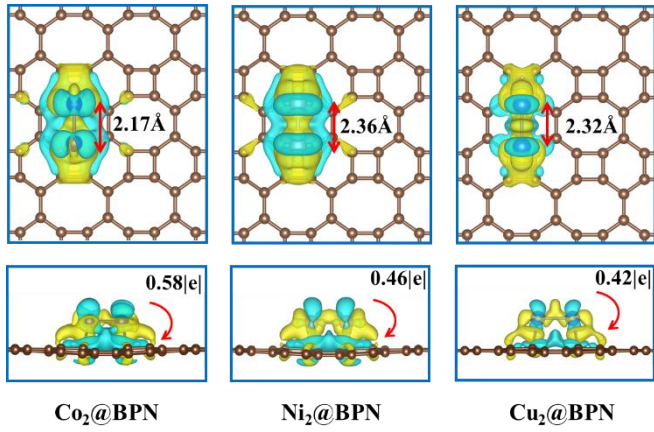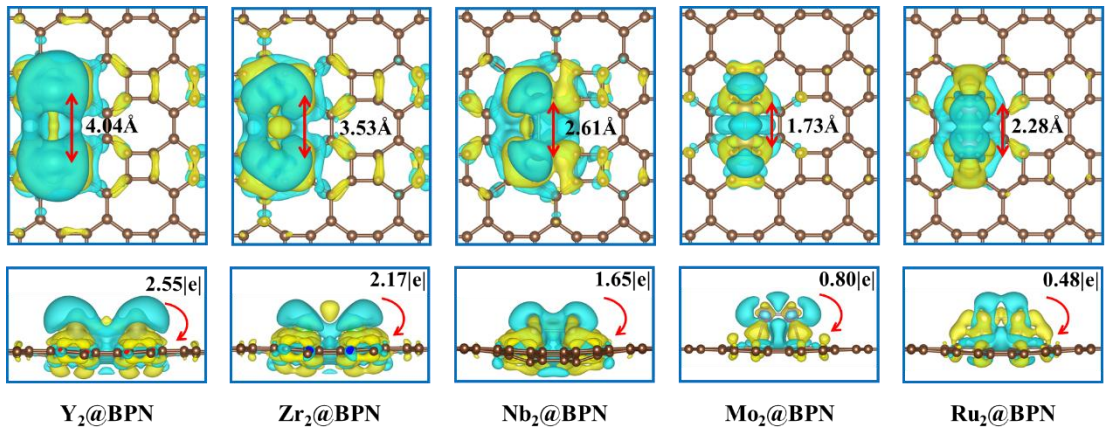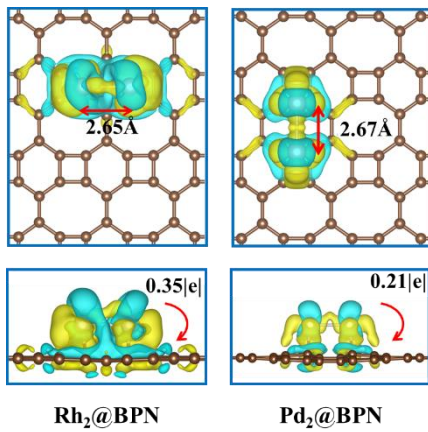

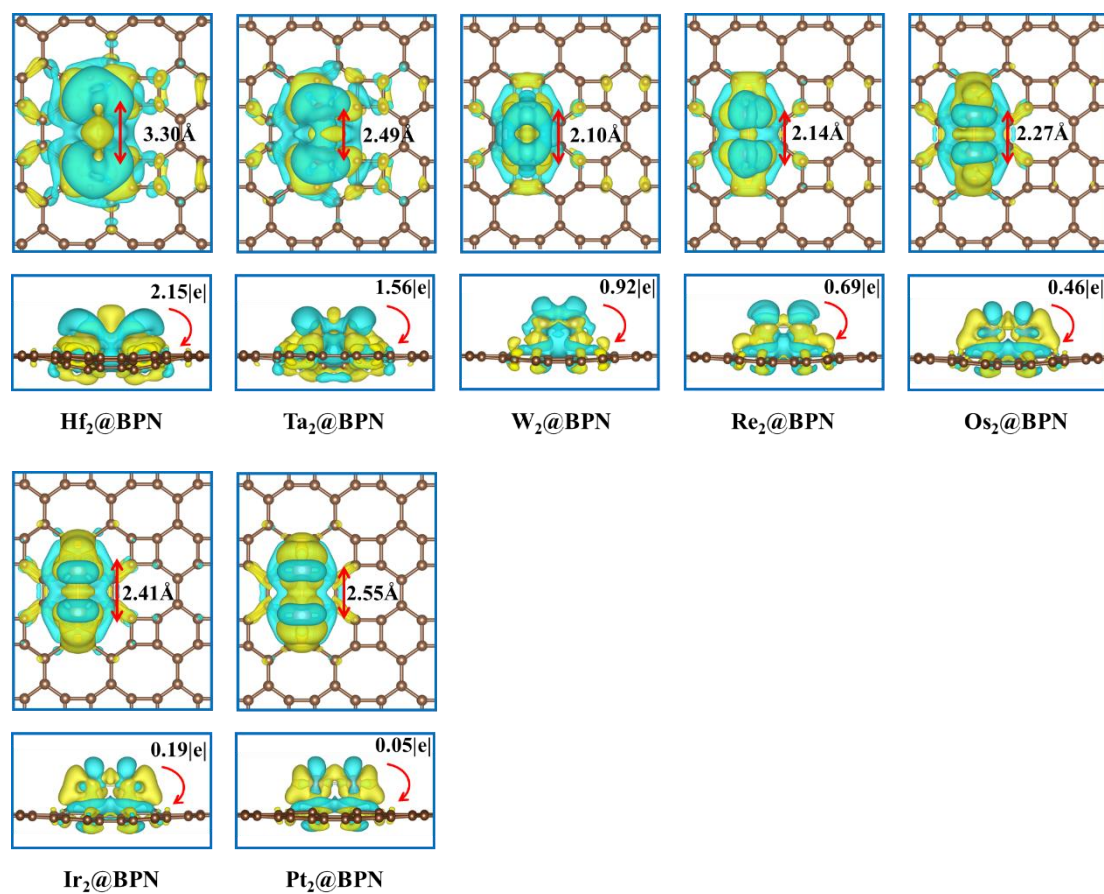

**Fig. S8.** CDD distributions for 22 TM<sub>2</sub>@BPN, where the isosurface value is 0.0015 eÅ<sup>-3</sup> and cyan and yellow represent the accumulation and depletion of charge, respectively.

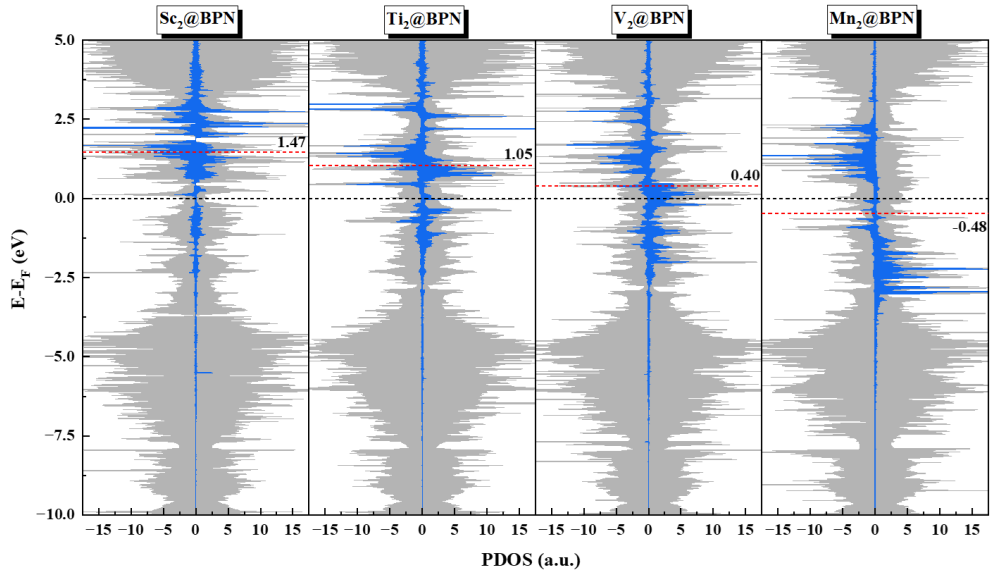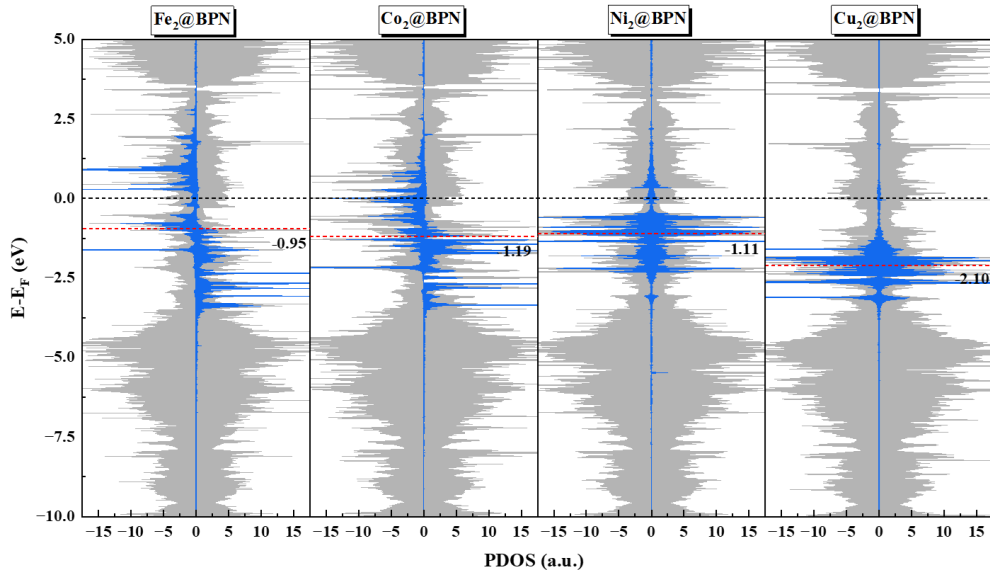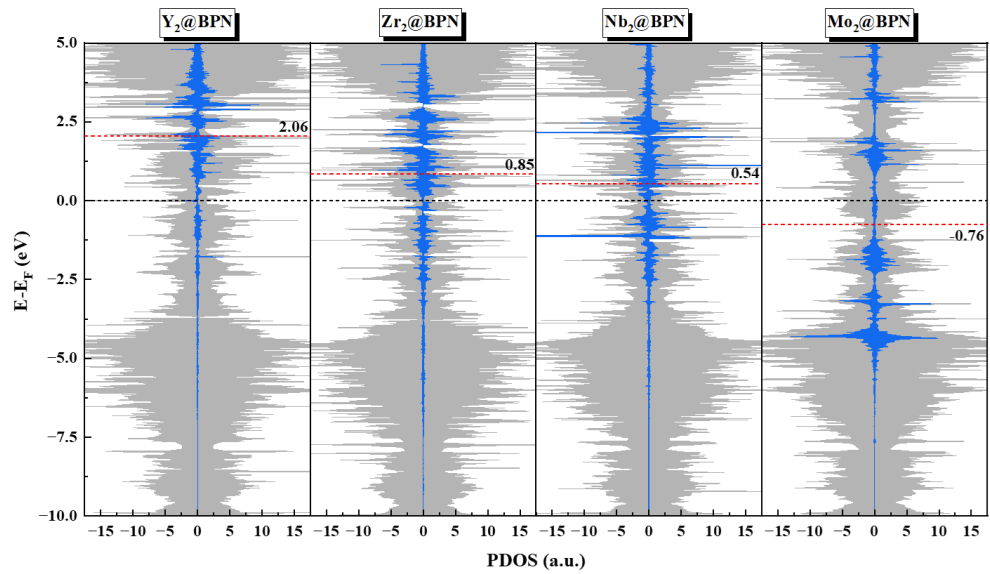

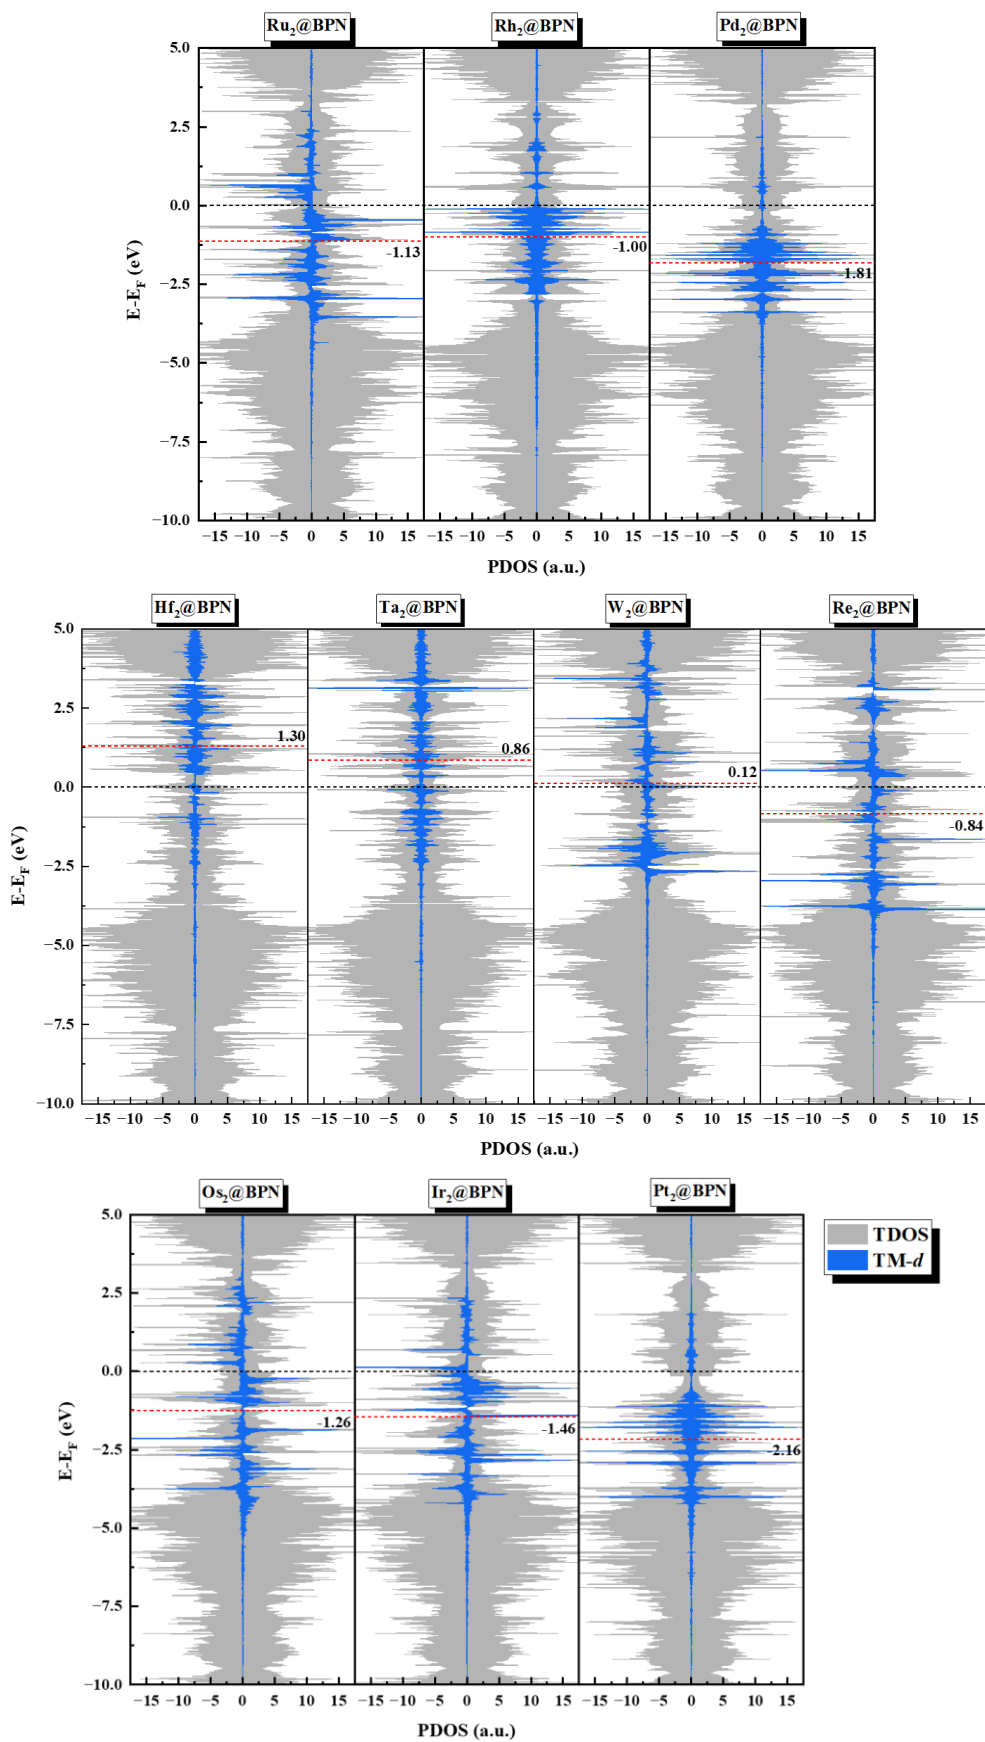

**Fig. S9.** Calculated the TDOS and *d*-orbital PDOS for 22  $\text{TM}_2@BPN$ , displayed in gray and blue, respectively.

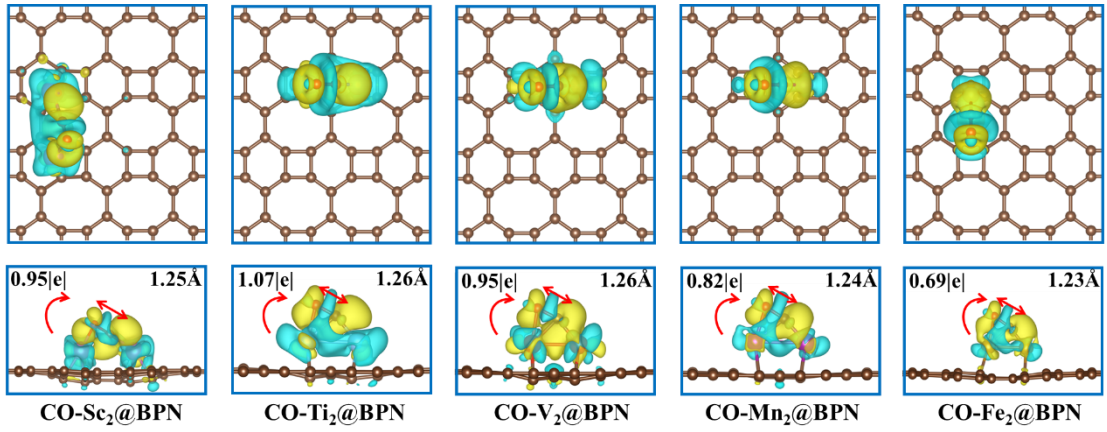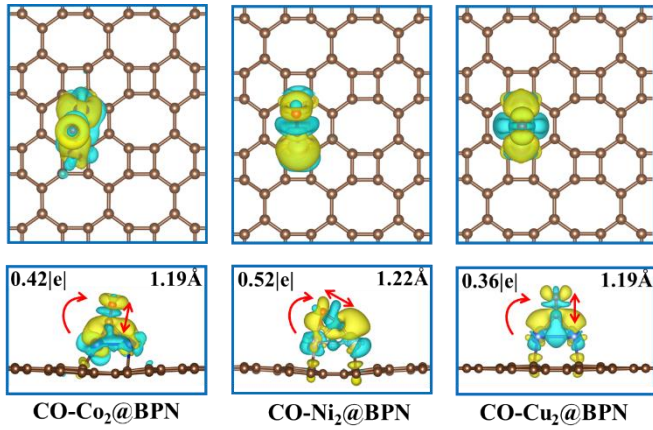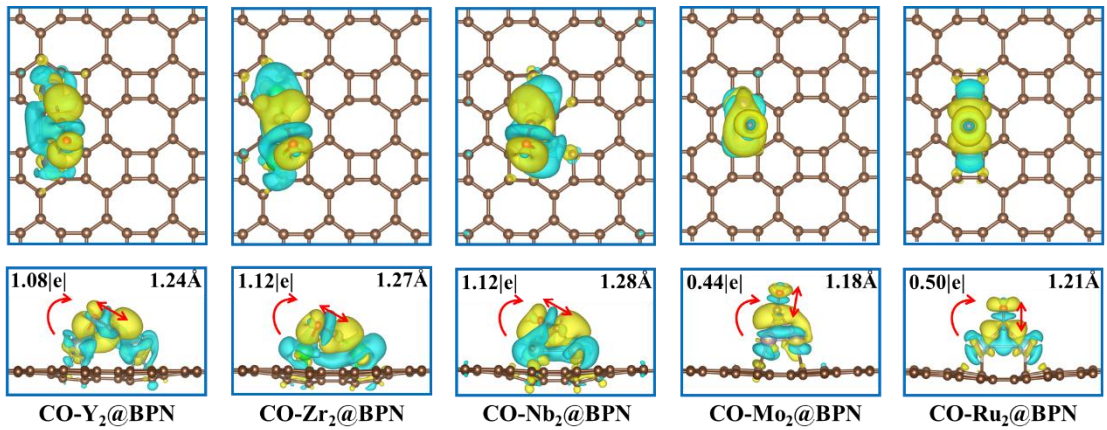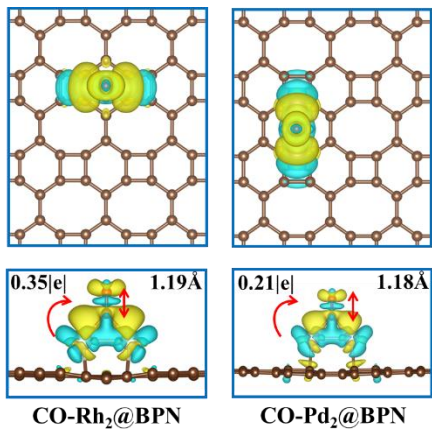

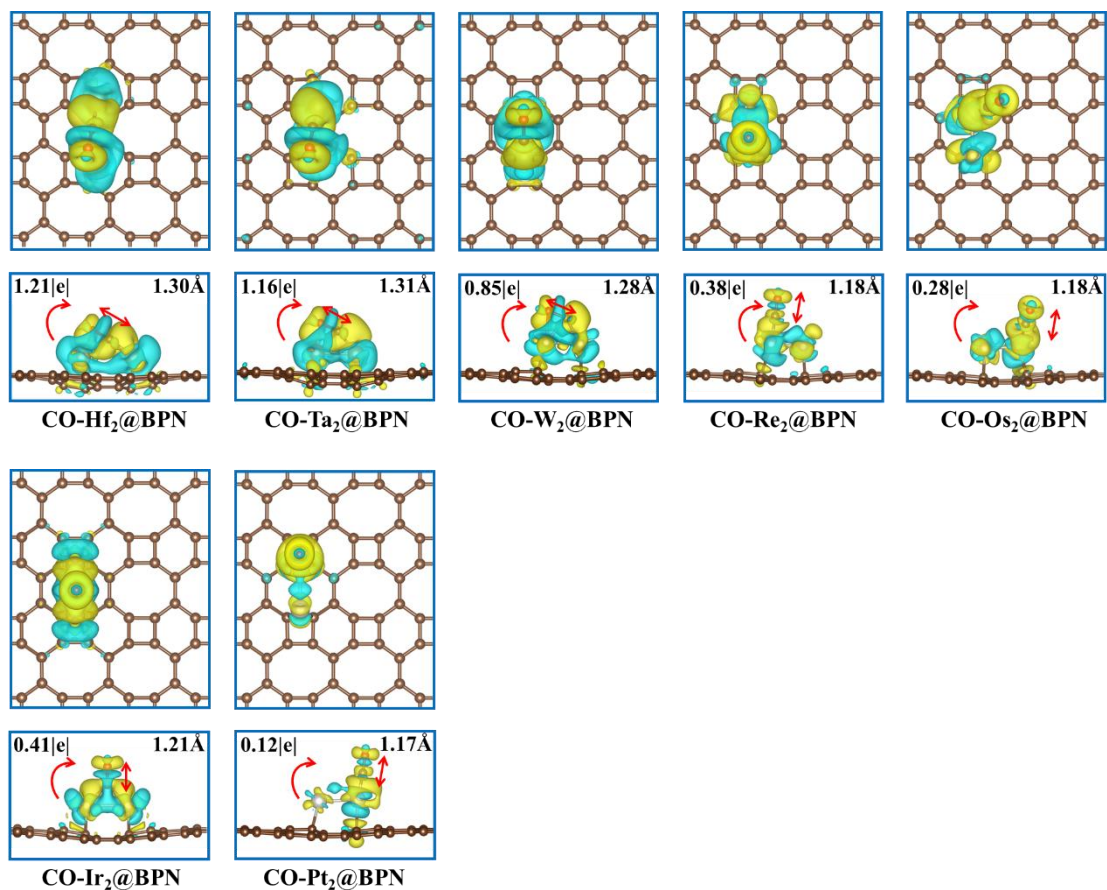

**Fig. S10.** CDD distributions for 22 CO-TM<sub>2</sub>@BPN catalysts, with an isosurface value set at  $0.0015 \text{ e}\text{\AA}^{-3}$ . In these distributions, cyan and yellow indicate the accumulation and depletion of charge, respectively

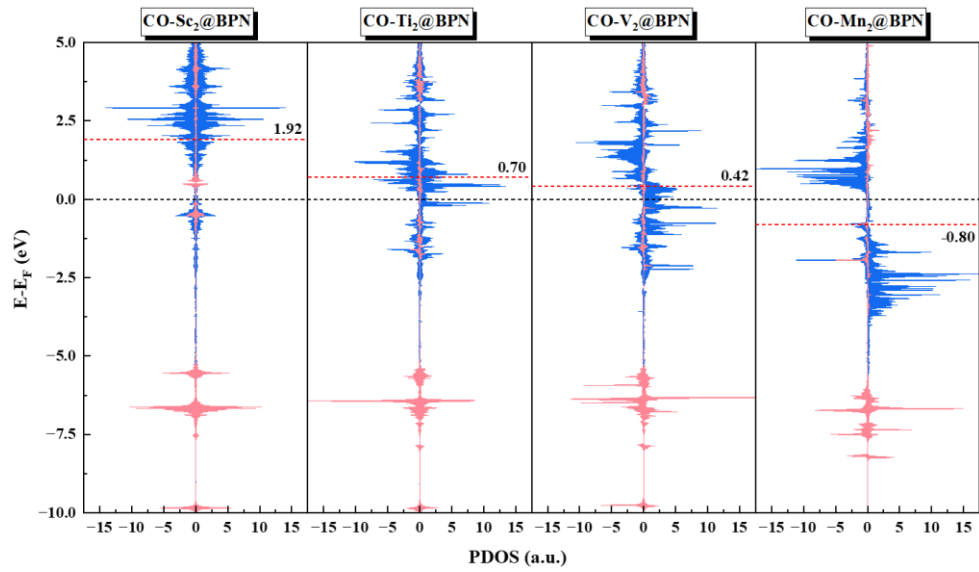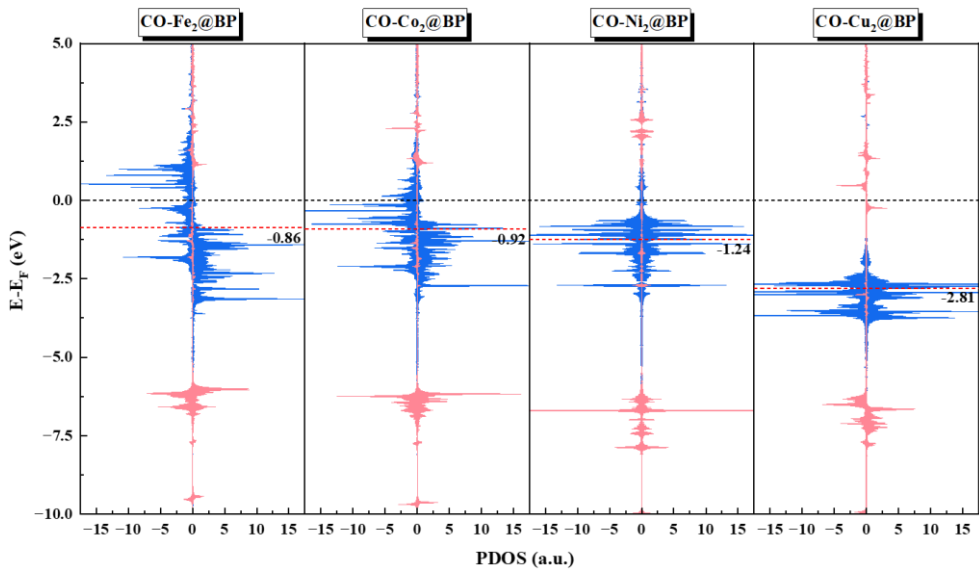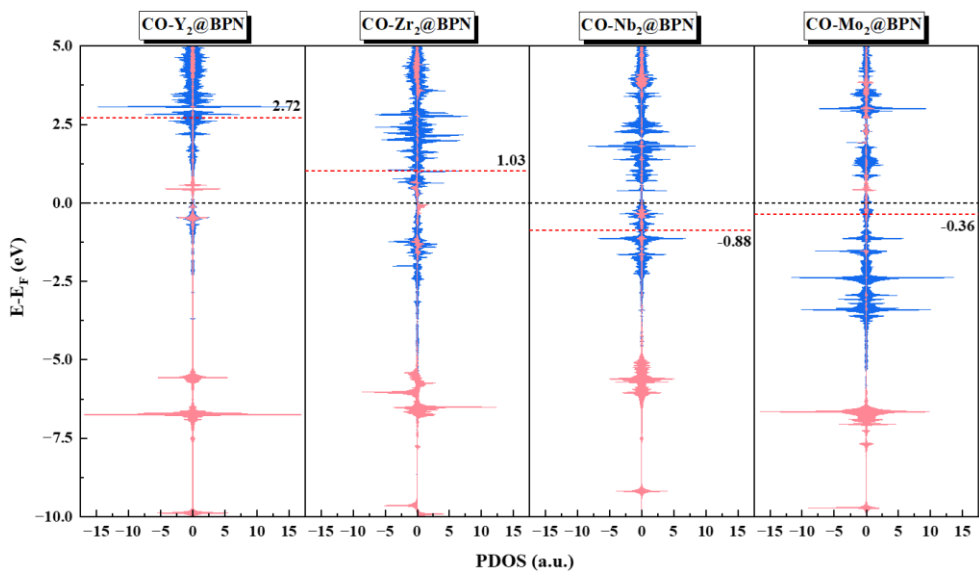



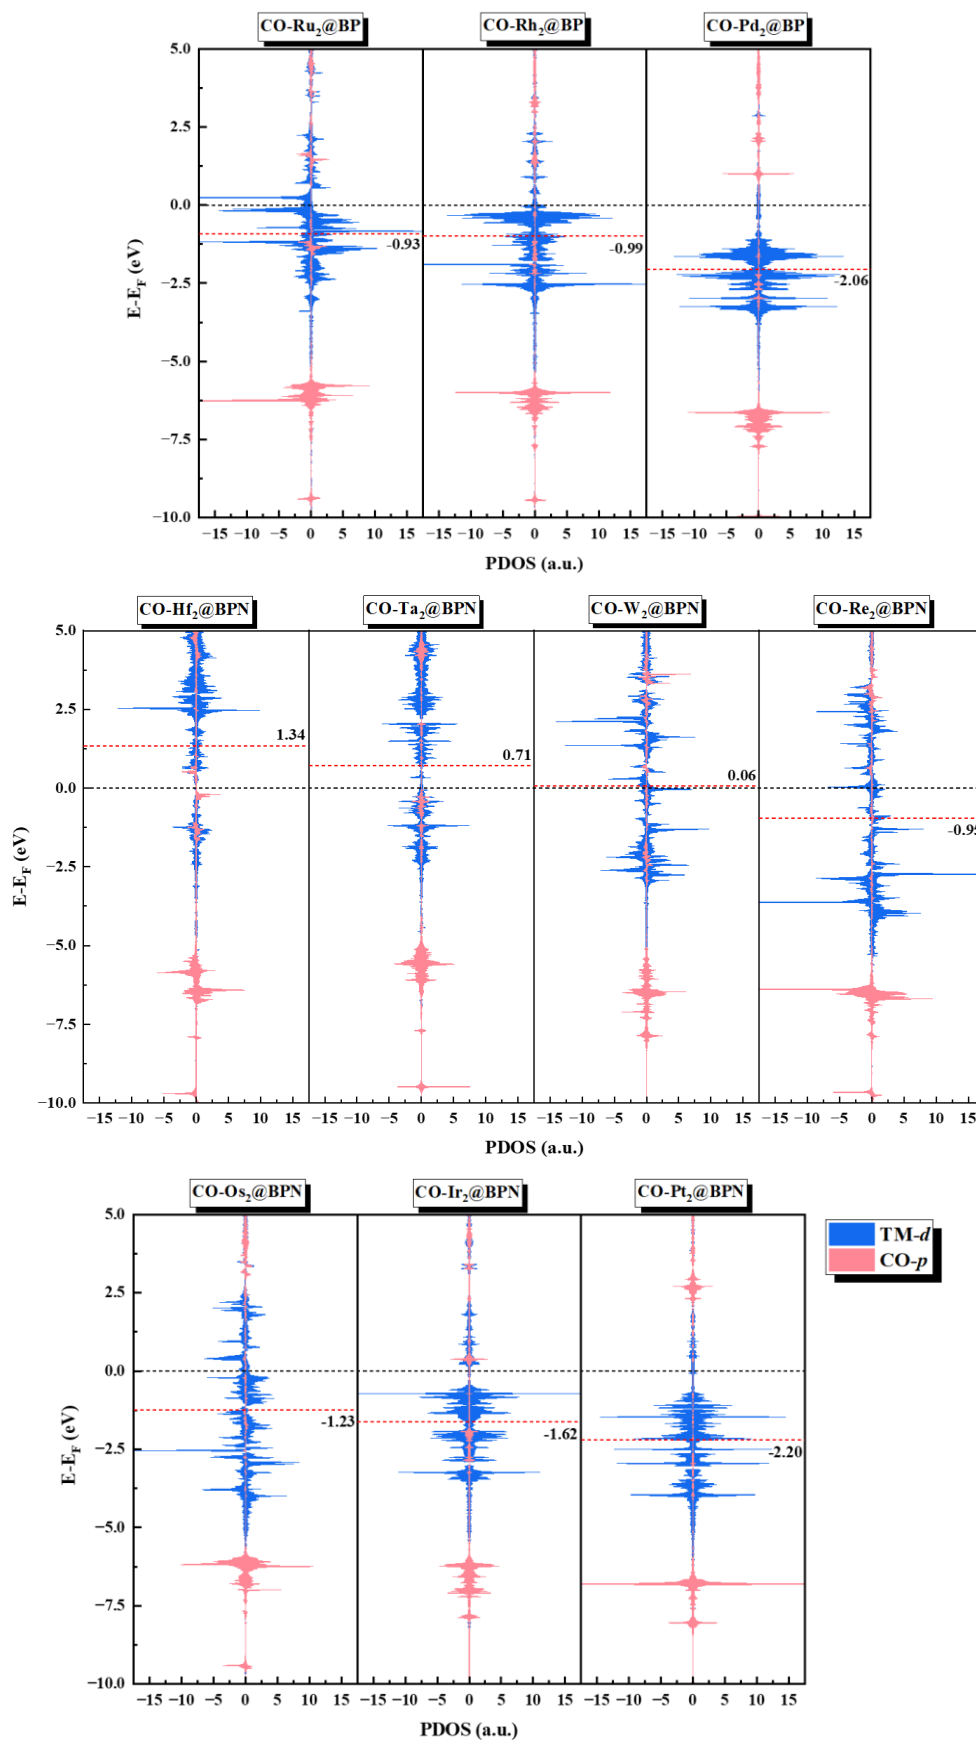

**Fig. S11.** PDOS calculations for CO molecules on 22  $\text{TM}_2@BPN$  surfaces. The  $d$ -orbitals of TM and the  $p$ -orbitals of CO are depicted in blue and pink, respectively.

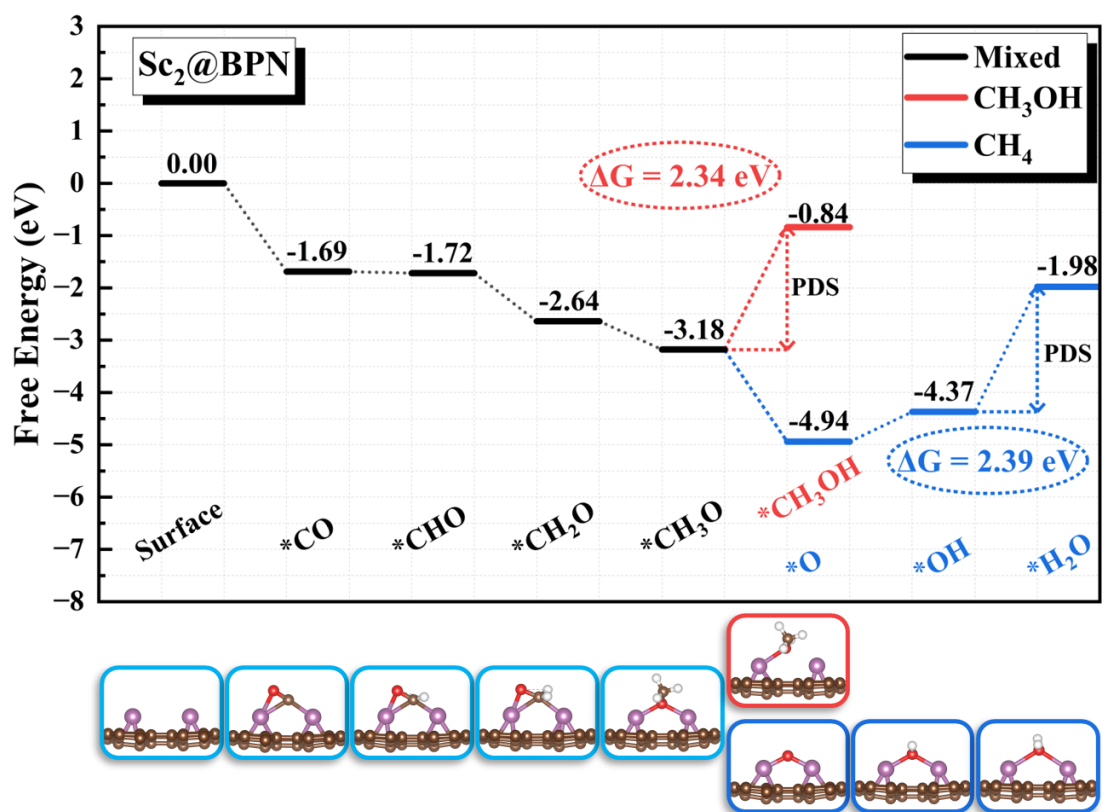

**Fig. S12.** Free energy diagram of CO reduction to various C<sub>1</sub> on Sc<sub>2</sub>@BPN. The black line represents the common path, the red line represents the CH<sub>3</sub>OH path, and the blue line represents the CH<sub>4</sub> path.

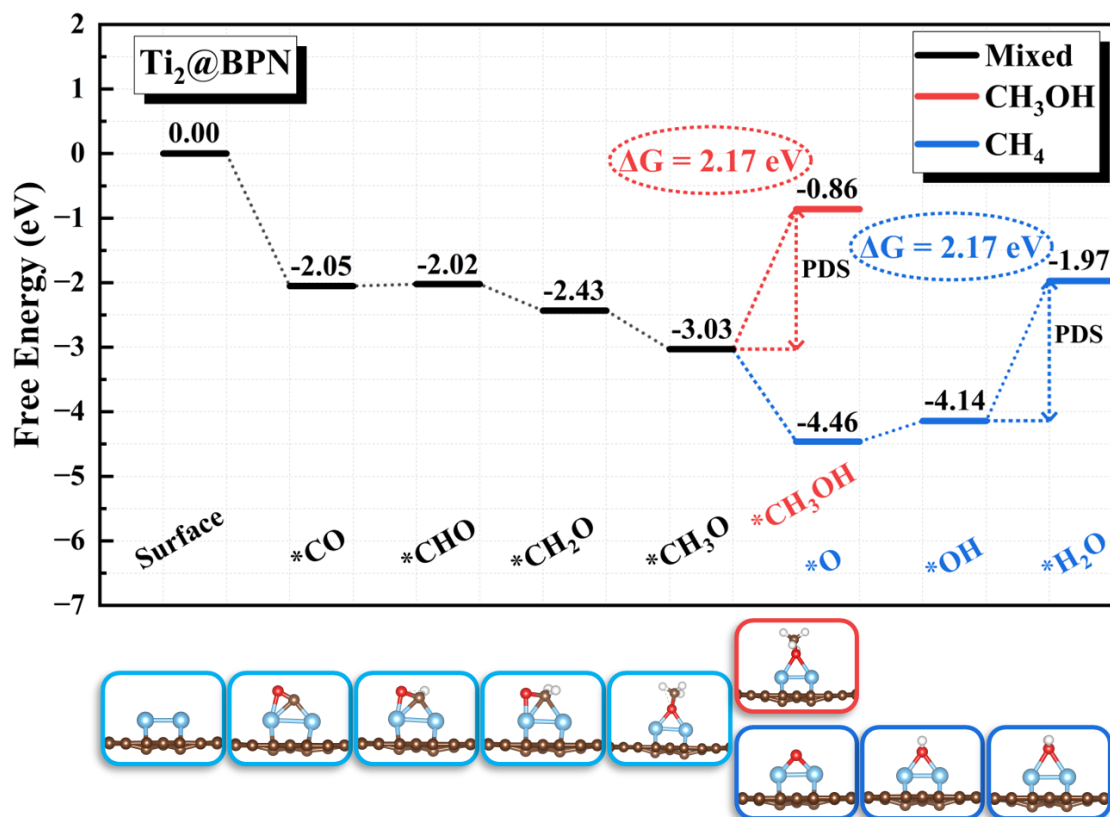

**Fig. S13.** Free energy diagram of CO reduction to various C<sub>1</sub> on Ti<sub>2</sub>@BPN. The black line represents the common path, the red line represents the CH<sub>3</sub>OH path, and the blue line represents the CH<sub>4</sub> path.

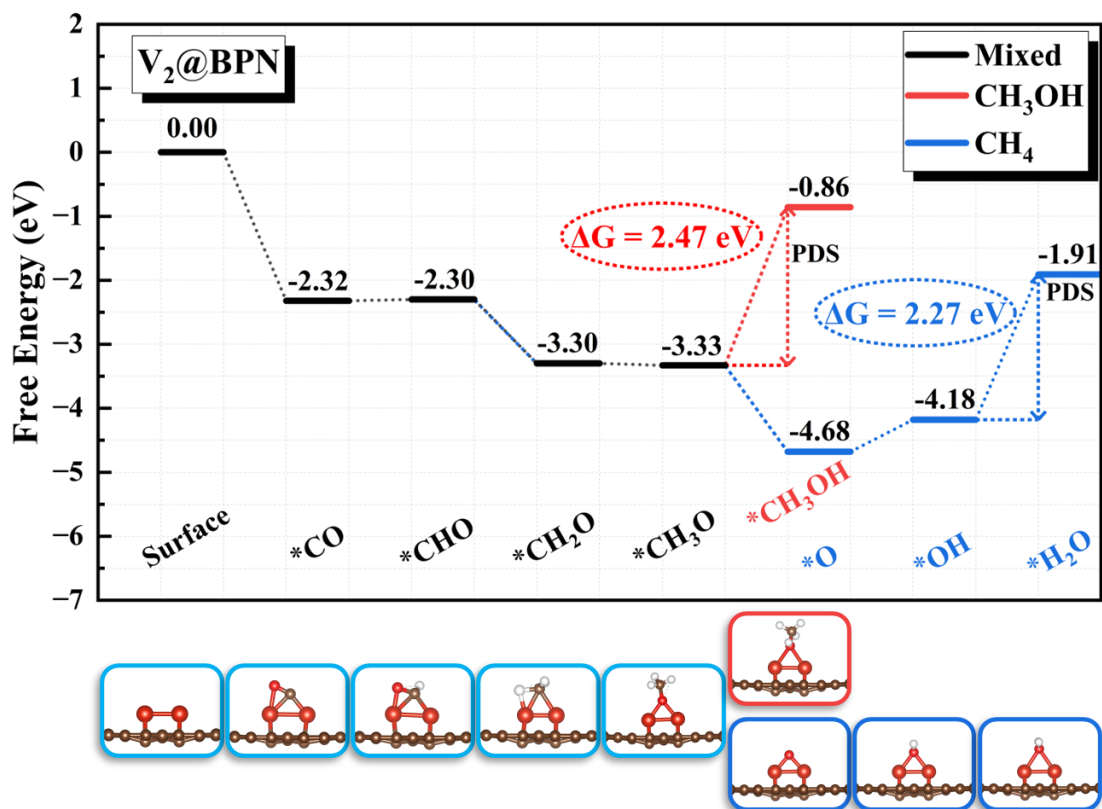

**Fig. S14.** Free energy diagram of CO reduction to various C<sub>1</sub> on V<sub>2</sub>@BPN. The black line represents the common path, the red line represents the CH<sub>3</sub>OH path, and the blue line represents the CH<sub>4</sub> path.

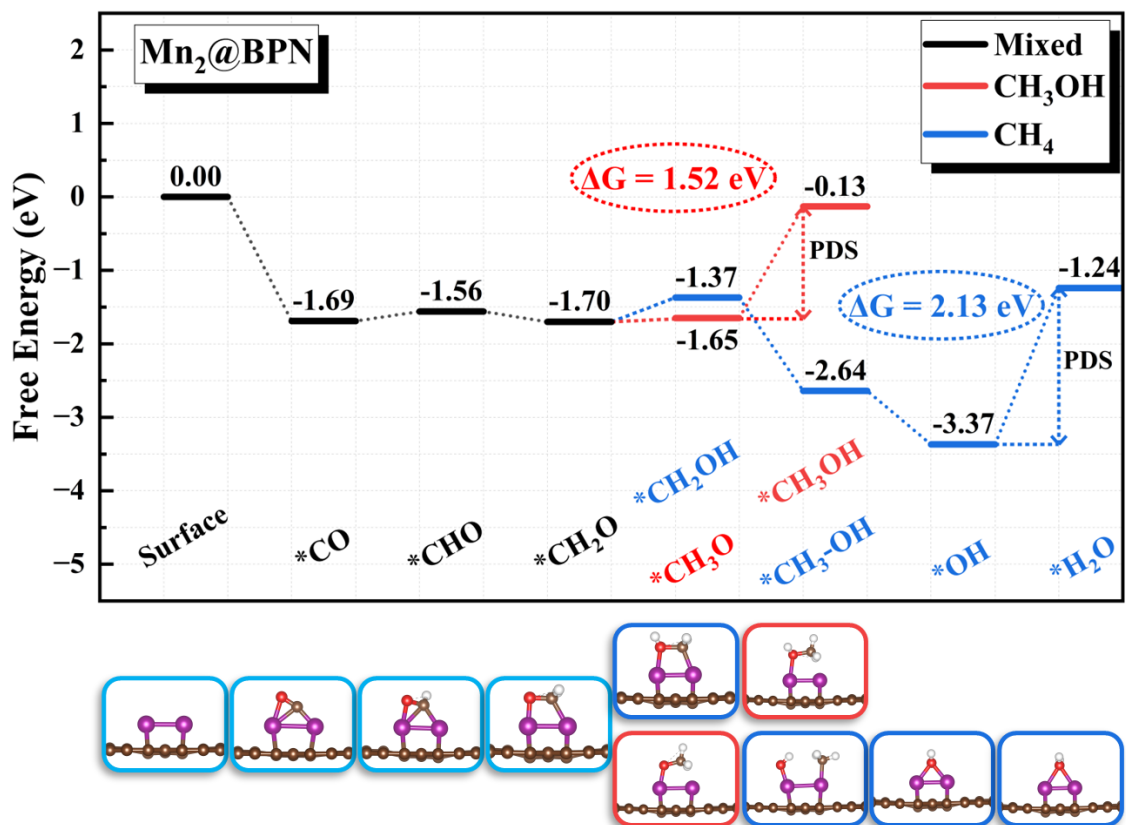

**Fig. S15.** Free energy diagram of CO reduction to various C<sub>1</sub> on Mn<sub>2</sub>@BPN. The black line represents the common path, the red line represents the CH<sub>3</sub>OH path, and the blue line represents the CH<sub>4</sub> path.

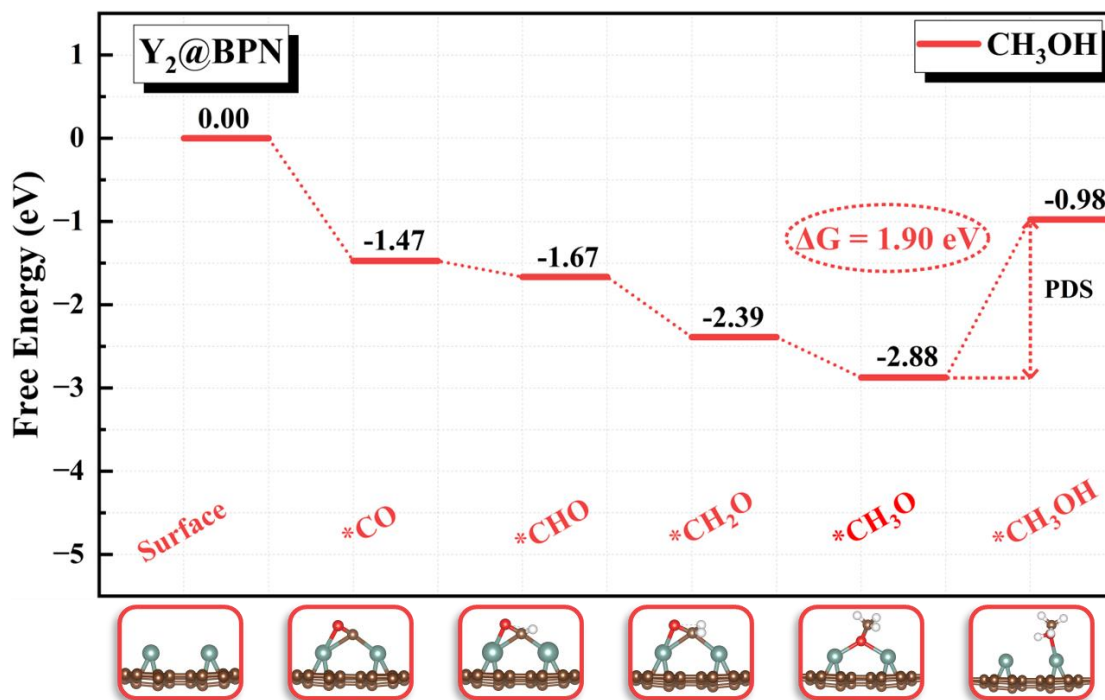

**Fig. S16.** Free energy diagram of CO reduction to various C<sub>1</sub> on Y<sub>2</sub>@BPN. The black line represents the common path, the red line represents the CH<sub>3</sub>OH path, and the blue line represents the CH<sub>4</sub> path.

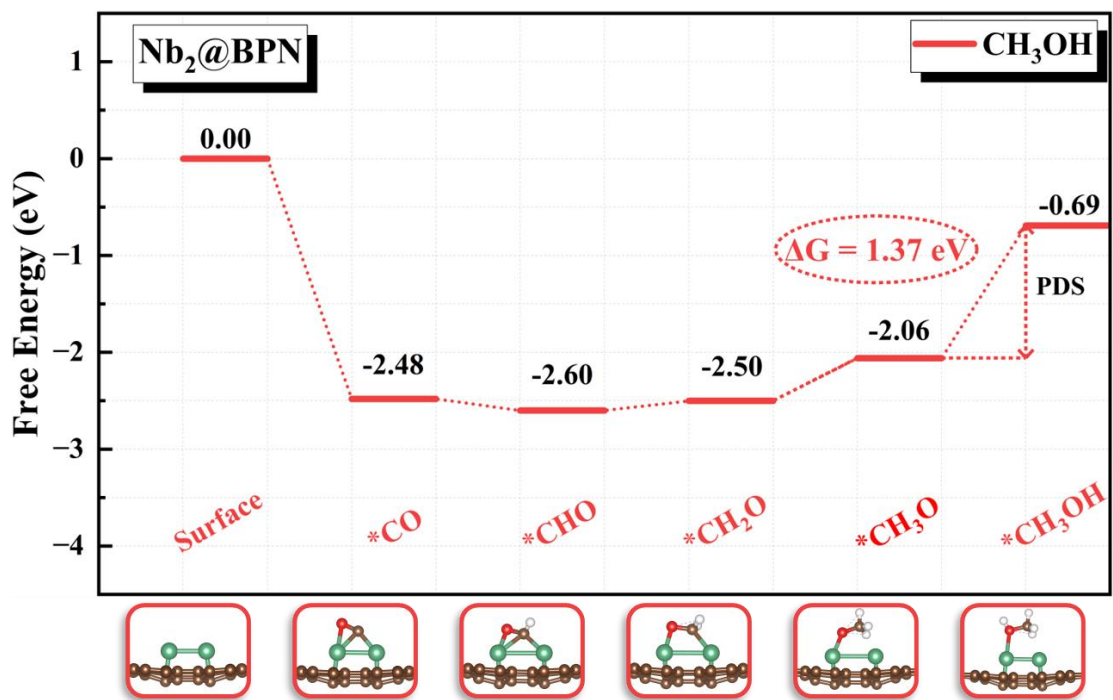

**Fig. S17.** Free energy diagram of CO reduction to various C<sub>1</sub> on Nb<sub>2</sub>@BPN. The black line represents the common path, the red line represents the CH<sub>3</sub>OH path, and the blue line represents the CH<sub>4</sub> path.

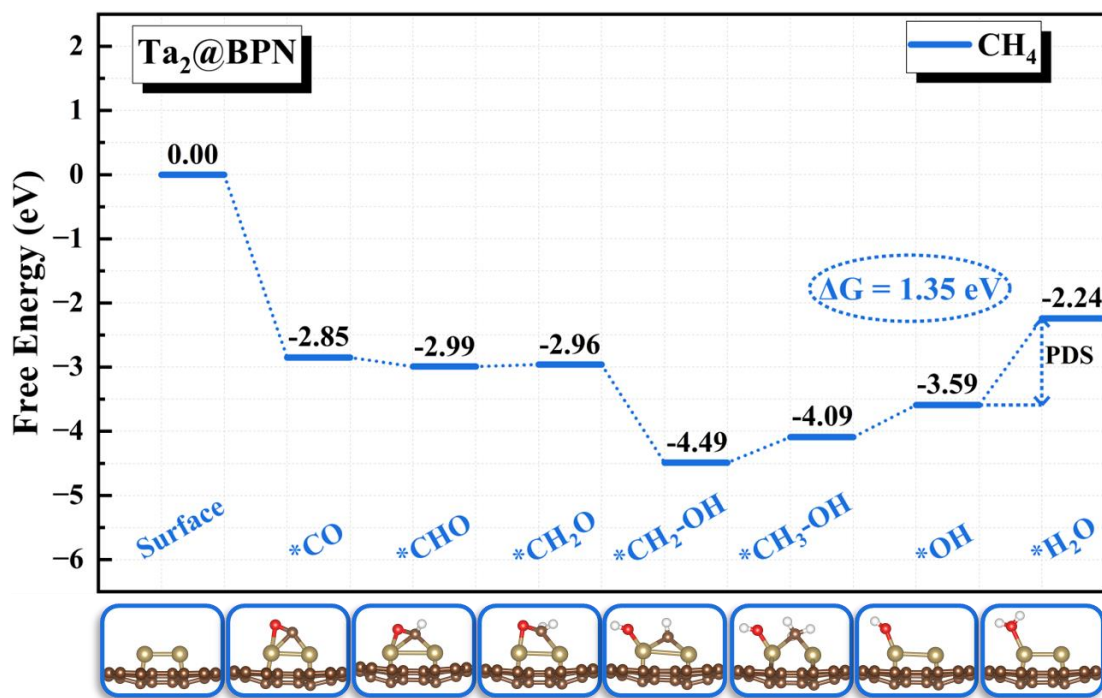

**Fig. S18.** Free energy diagram of CO reduction to various C<sub>1</sub> on Ta<sub>2</sub>@BPN. The black line represents the common path, the red line represents the CH<sub>3</sub>OH path, and the blue line represents the CH<sub>4</sub> path.



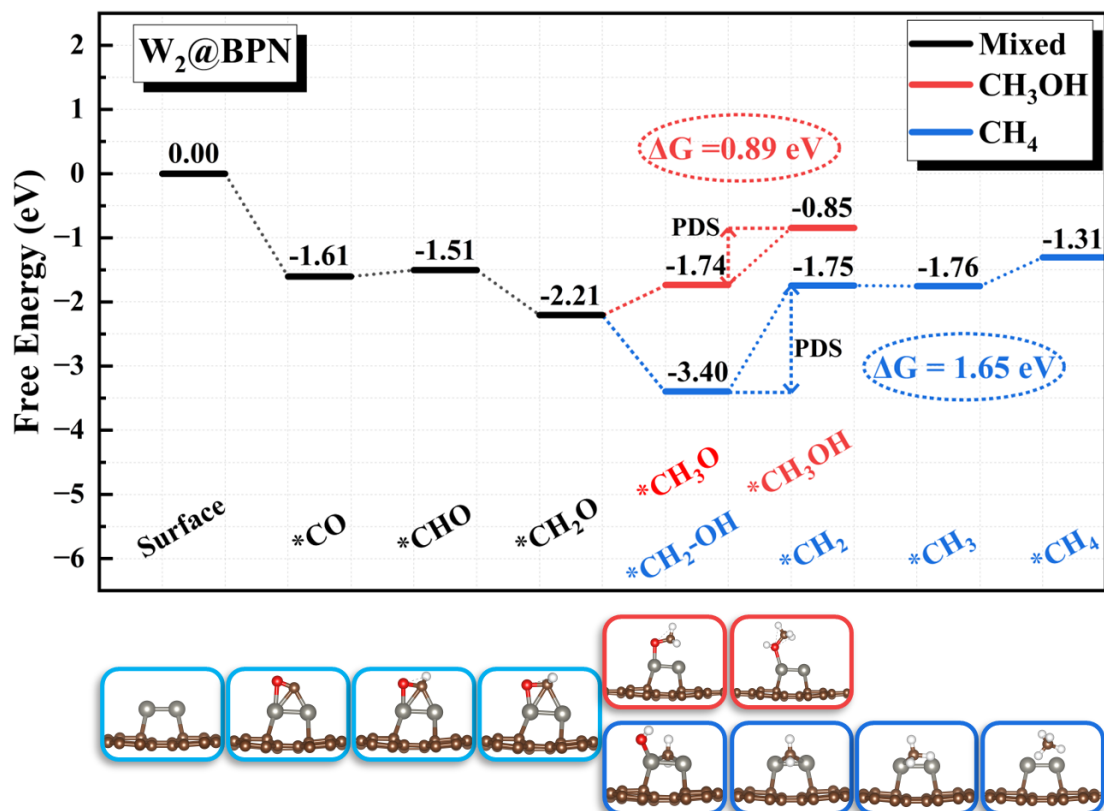

**Fig. S19.** Free energy diagram of CO reduction to various C<sub>1</sub> on W<sub>2</sub>@BPN. The black line represents the common path, the red line represents the CH<sub>3</sub>OH path, and the blue line represents the CH<sub>4</sub> path.

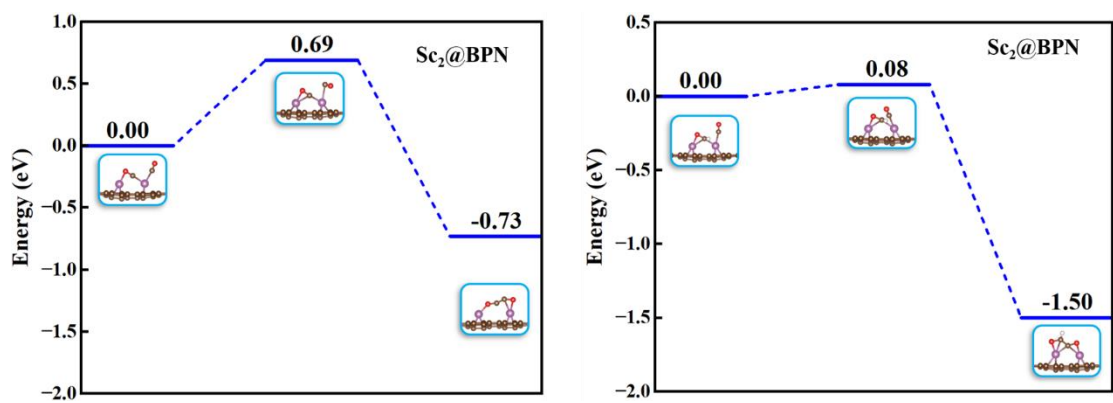

**Fig. S20.** IS, TS, and FS energy changes involved in the reaction  $*\text{CO.CO} \rightarrow *\text{COCO}$  and  $*\text{CHO.CO} \rightarrow *\text{CHOCO}$  for the Sc<sub>2</sub>@BPN.

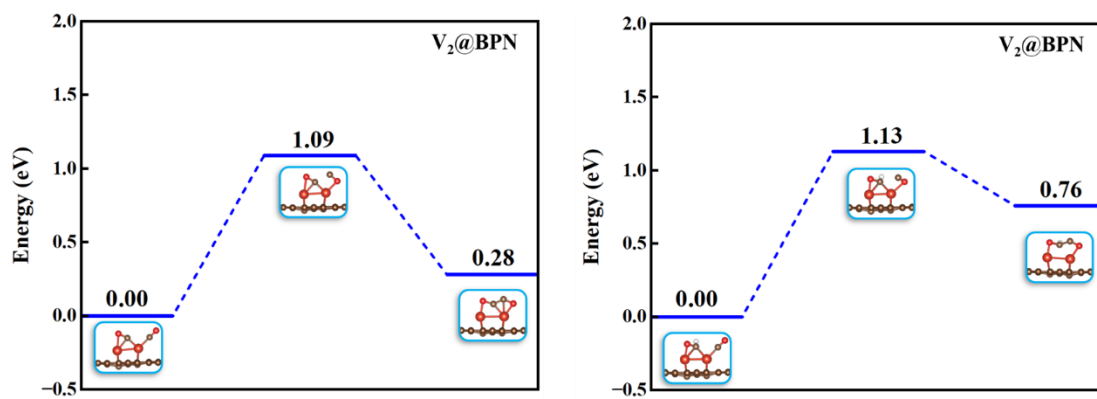

**Fig. S21.** IS, TS, and FS energy changes involved in the reaction  $*CO.CO \rightarrow *COCO$  and  $*CHO.CO \rightarrow *CHOCO$  for the  $V_2@BPN$ .

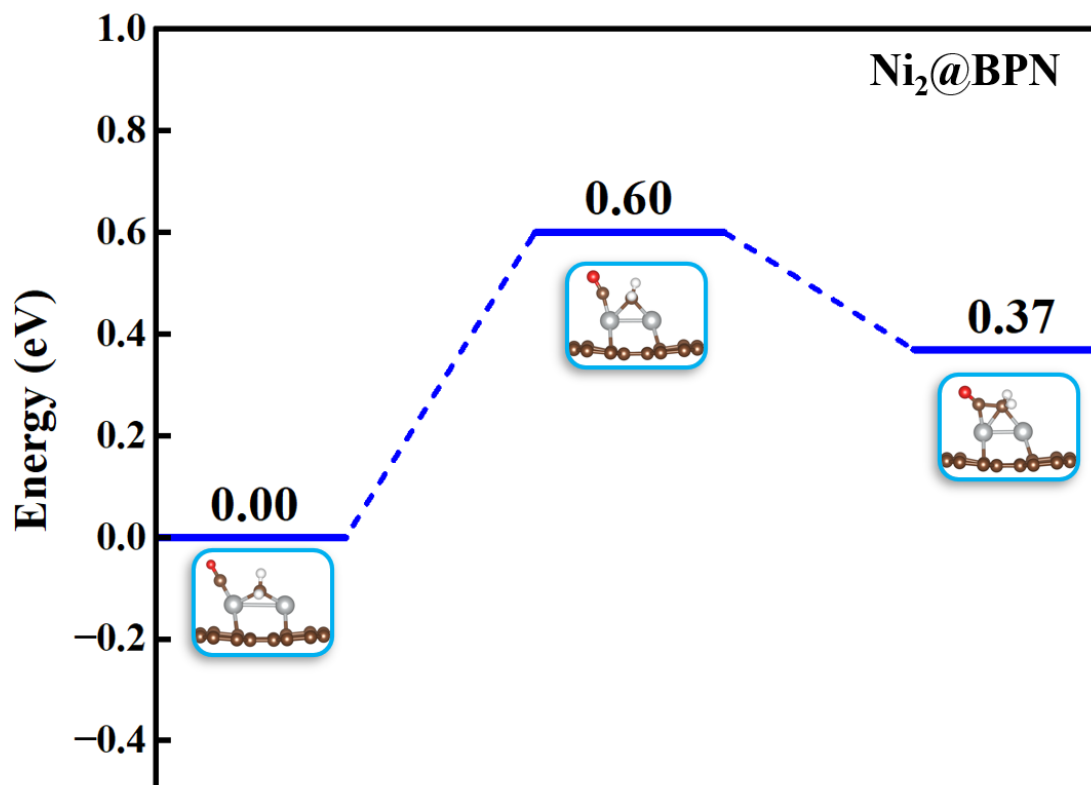

Fig. S22. IS, TS, and FS energy changes involved in the reaction  $^*CH_2CO \rightarrow ^*CH_2CO$  for the  $Ni_2@BPN$ .

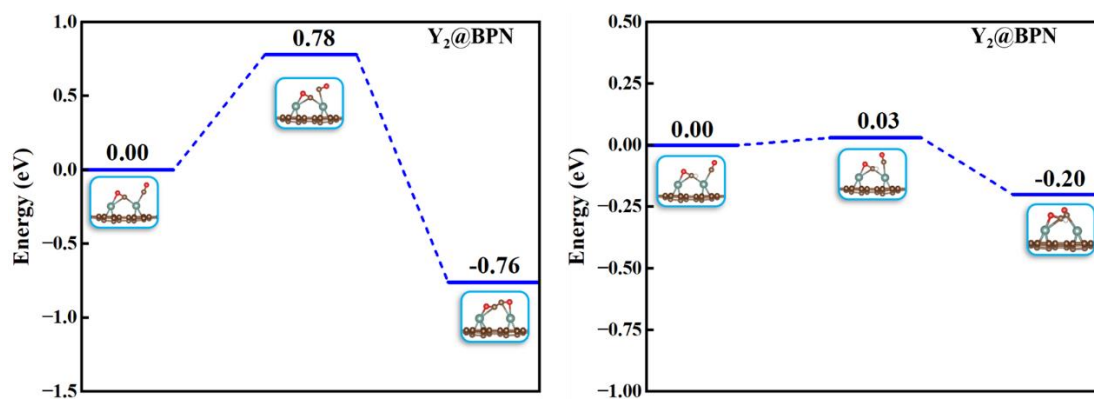

**Fig. S23.** IS, TS, and FS energy changes involved in the reaction  $*CO.CO \rightarrow *COCO$  and  $*CHO.CO \rightarrow *CHOCO$  for the  $Y_2@BPN$ .

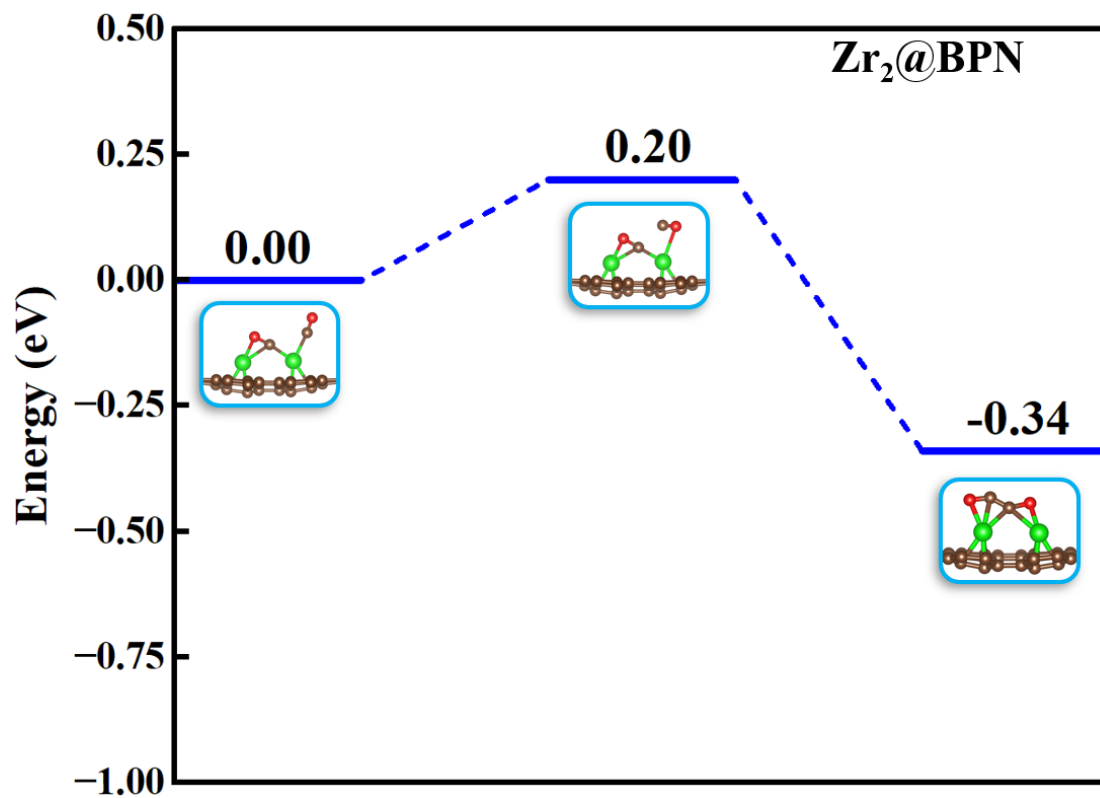

Fig. S24. IS, TS, and FS energy changes involved in the reaction  $*CO.CO \rightarrow *COCO$  for the  $Zr_2@BPN$ .

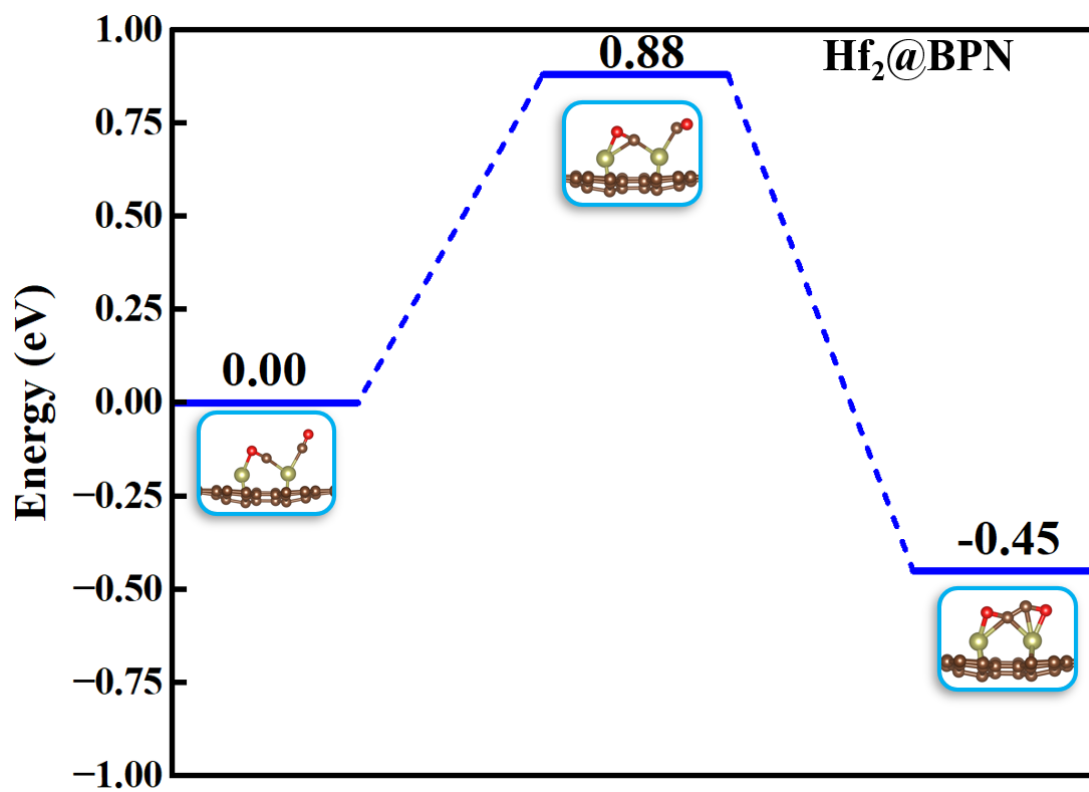

**Fig. S25.** IS, TS, and FS energy changes involved in the reaction  $*CO.CO \rightarrow *COCO$  for the  $Hf_2@BPN$ .

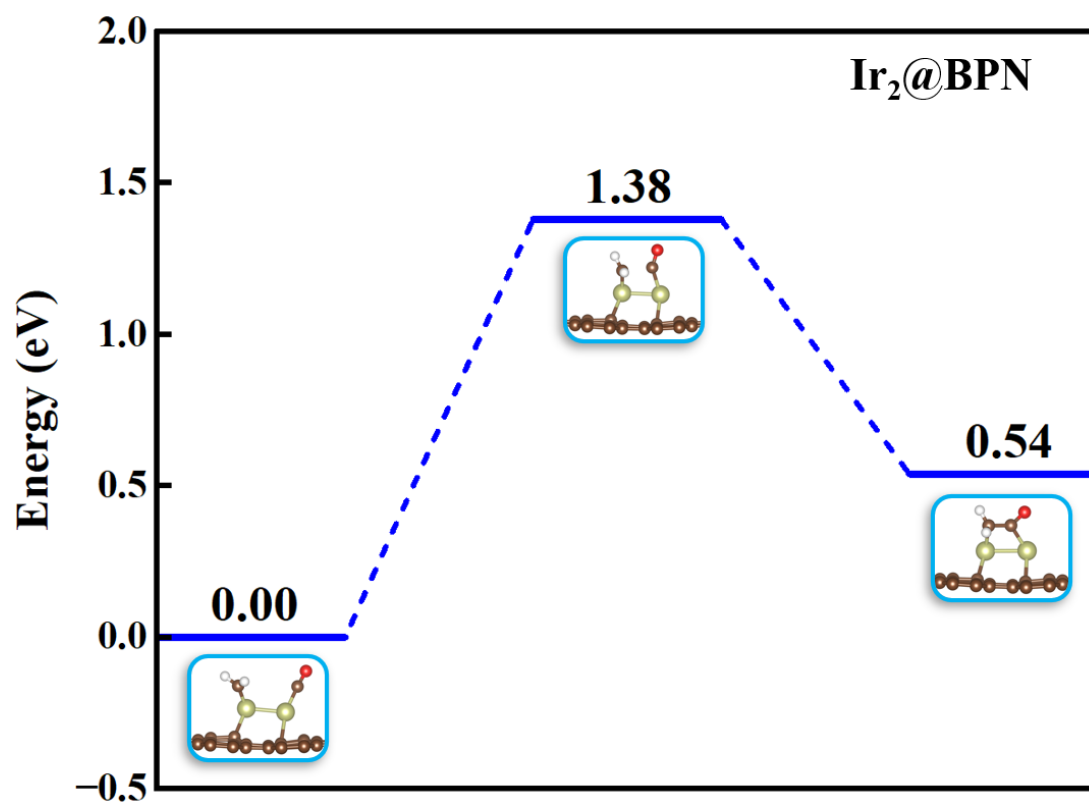

Fig. S26. IS, TS, and FS energy changes involved in the reaction  $^*CH_2.CO \rightarrow ^*CH_2CO$  for the Ir<sub>2</sub>@BPN.



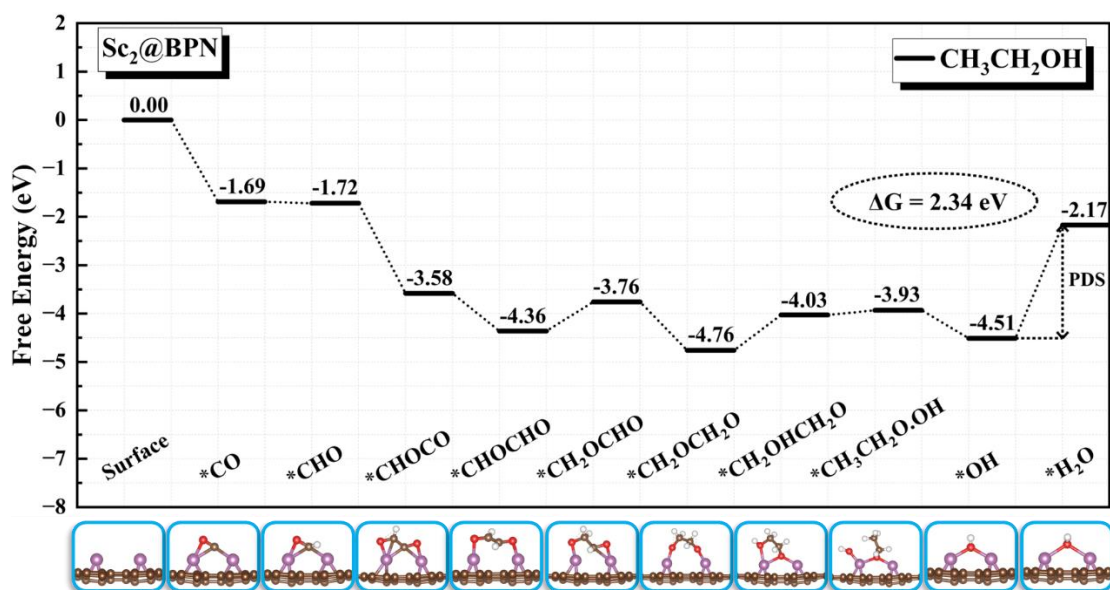

Fig. S27. Free energy diagram of CO reduction to various C<sub>2</sub> on Sc<sub>2</sub>@BPN.

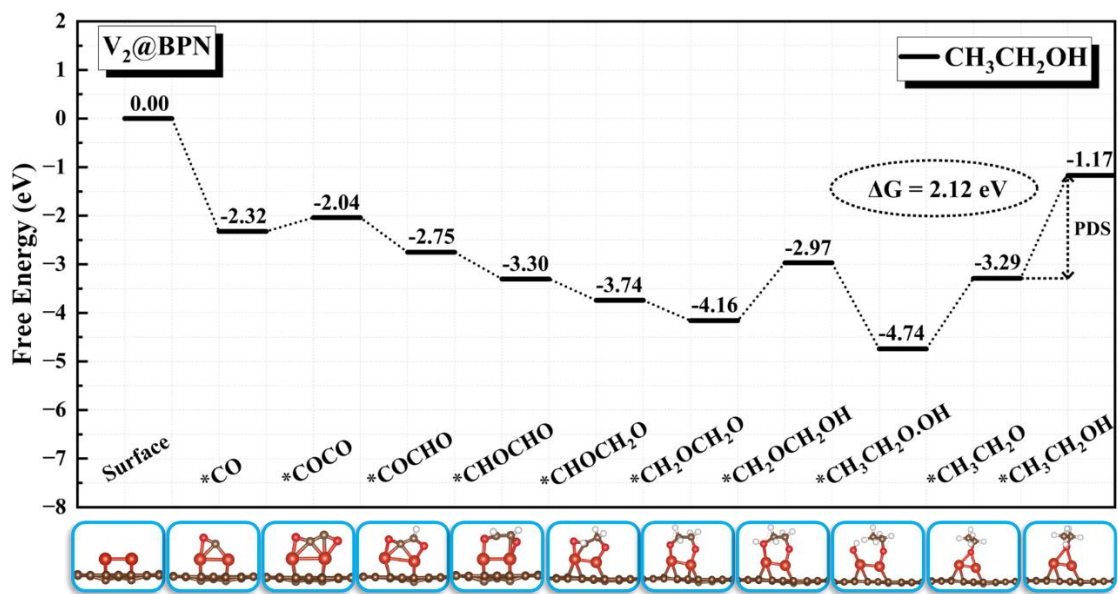

Fig. S28. Free energy diagram of CO reduction to various C<sub>2</sub> on V<sub>2</sub>@BPN.

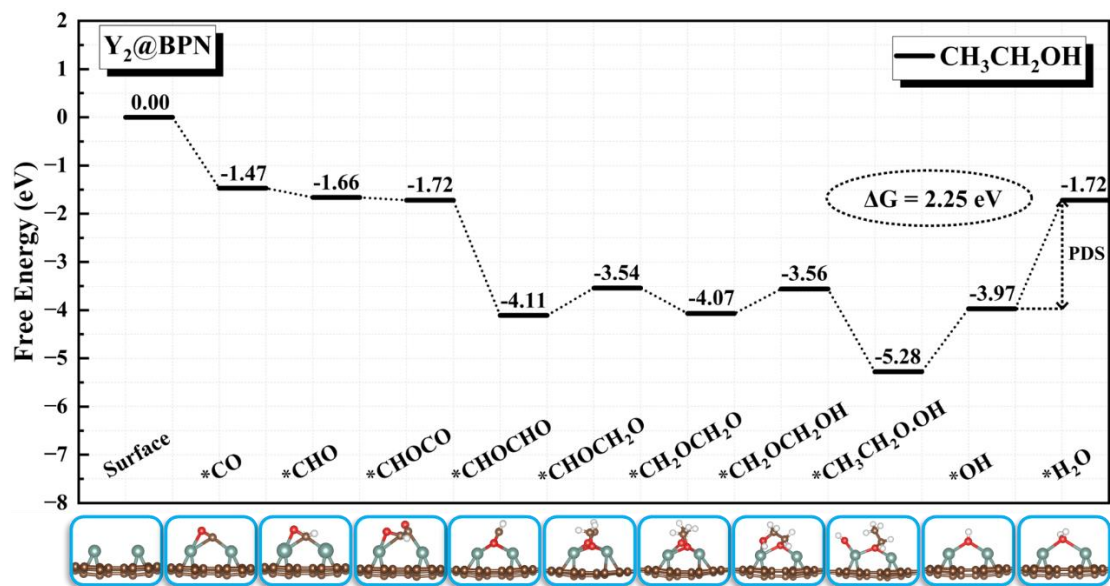

Fig. S29. Free energy diagram of CO reduction to various C<sub>2</sub> on Y<sub>2</sub>@BPN.

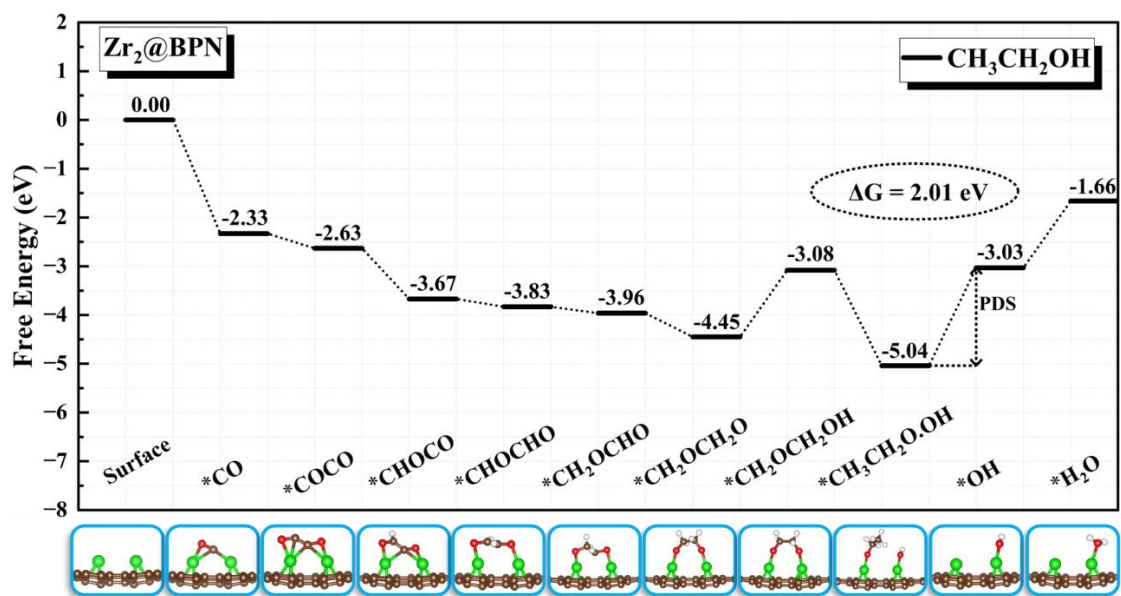

Fig. S30. Free energy diagram of CO reduction to various C<sub>2</sub> on Zr<sub>2</sub>@BPN.

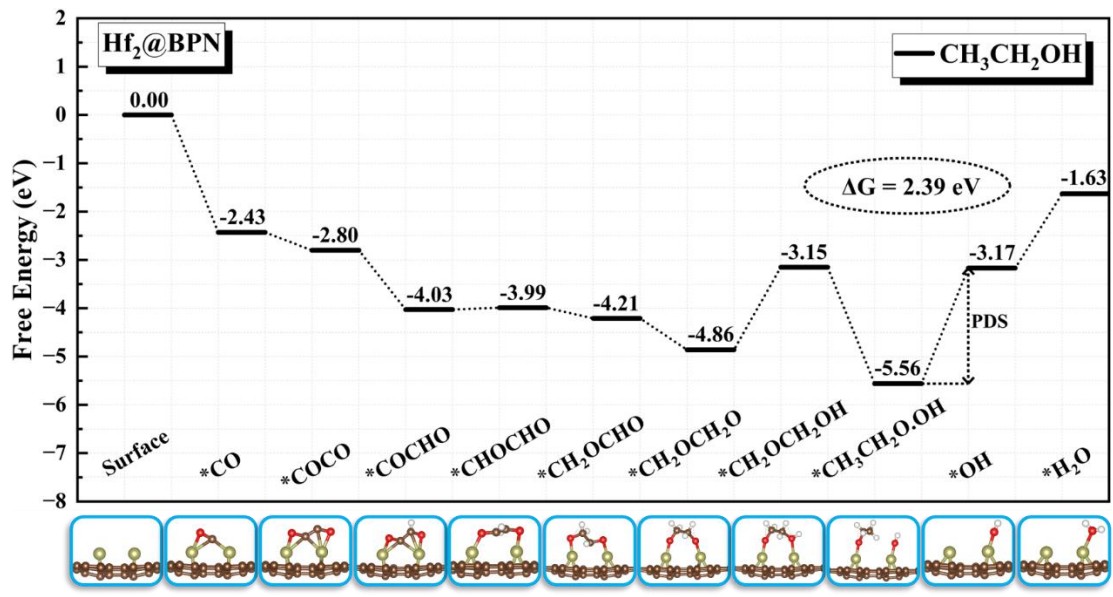

Fig. S31. Free energy diagram of CO reduction to various C<sub>2</sub> on Hf<sub>2</sub>@BPN.

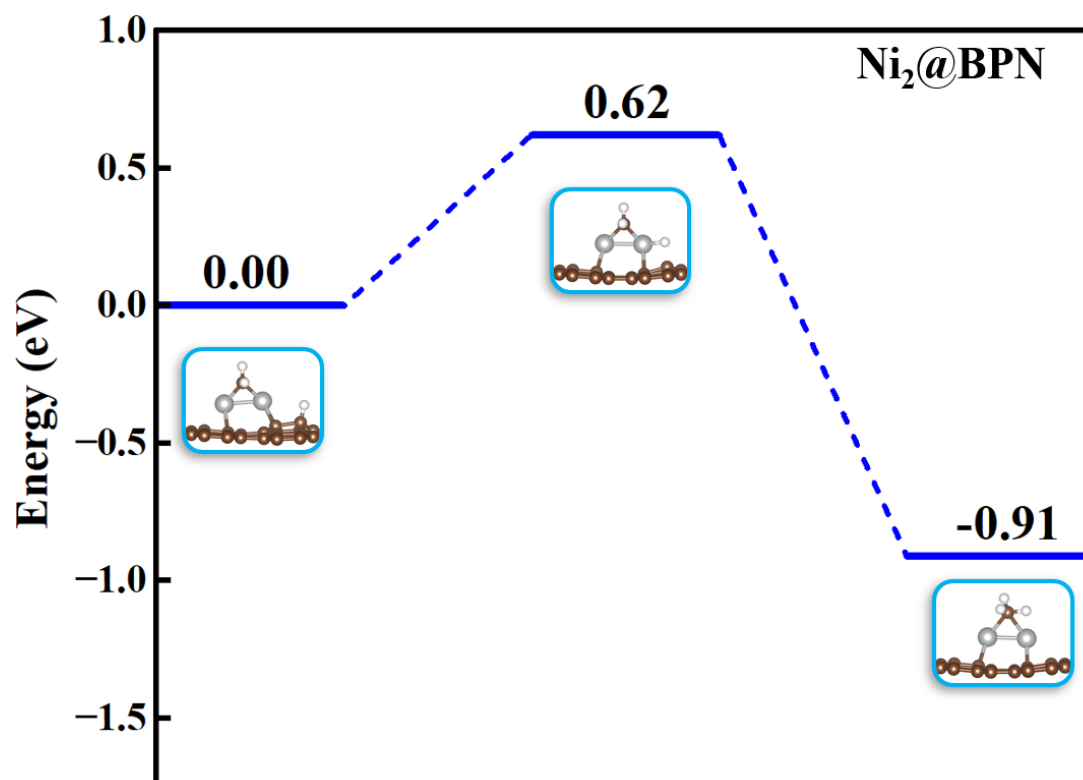

Fig. S32. IS, TS, and FS energy changes involved in the reaction  $^*CH_2.H \rightarrow ^*CH_3$  for the  $Ni_2@BPN$ .

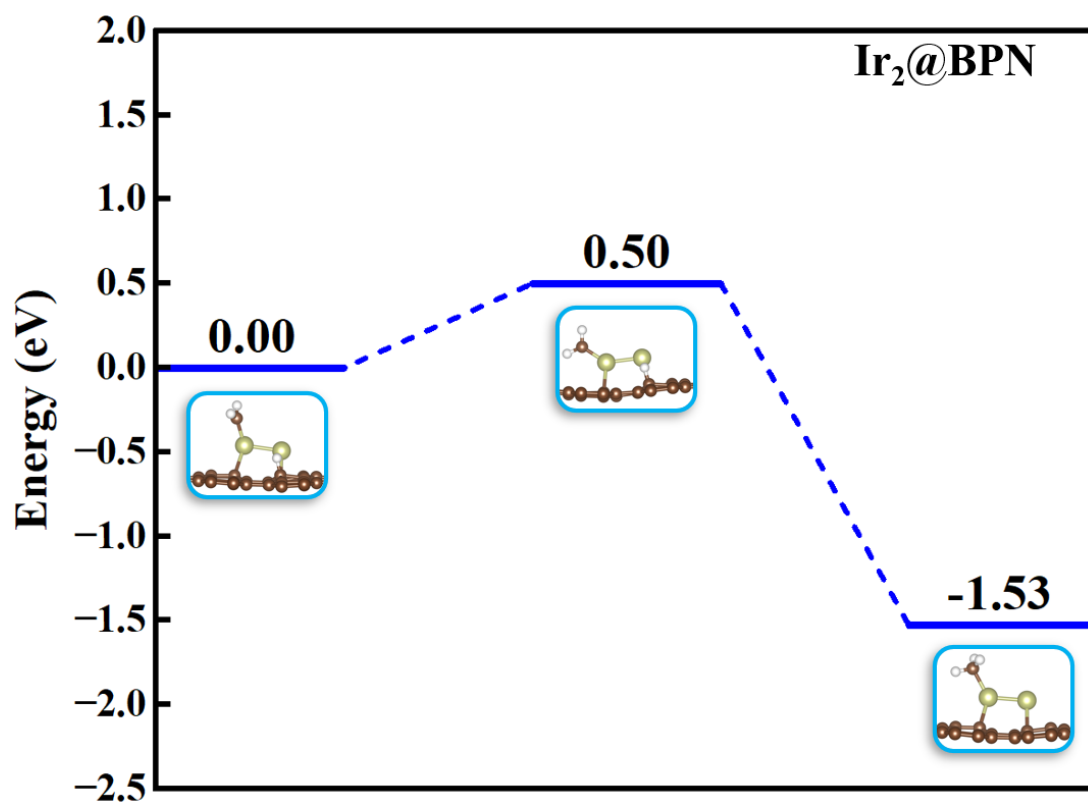

Fig. S33. IS, TS, and FS energy changes involved in the reaction  $^*CH_2.H \rightarrow ^*CH_3$  for the  $Ir_2@BPN$ .

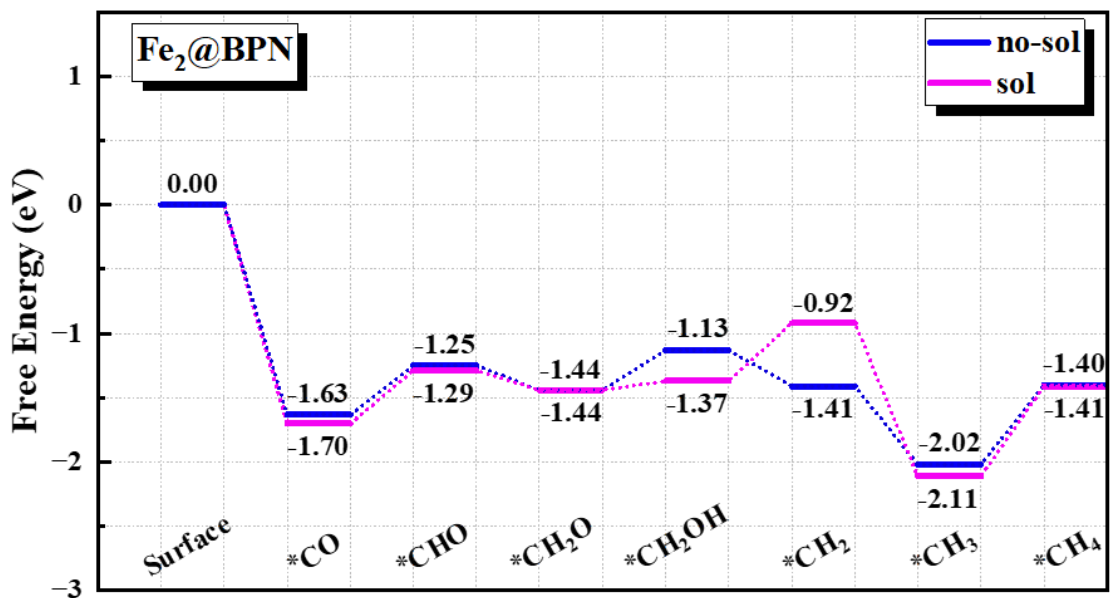

Reaction Pathway

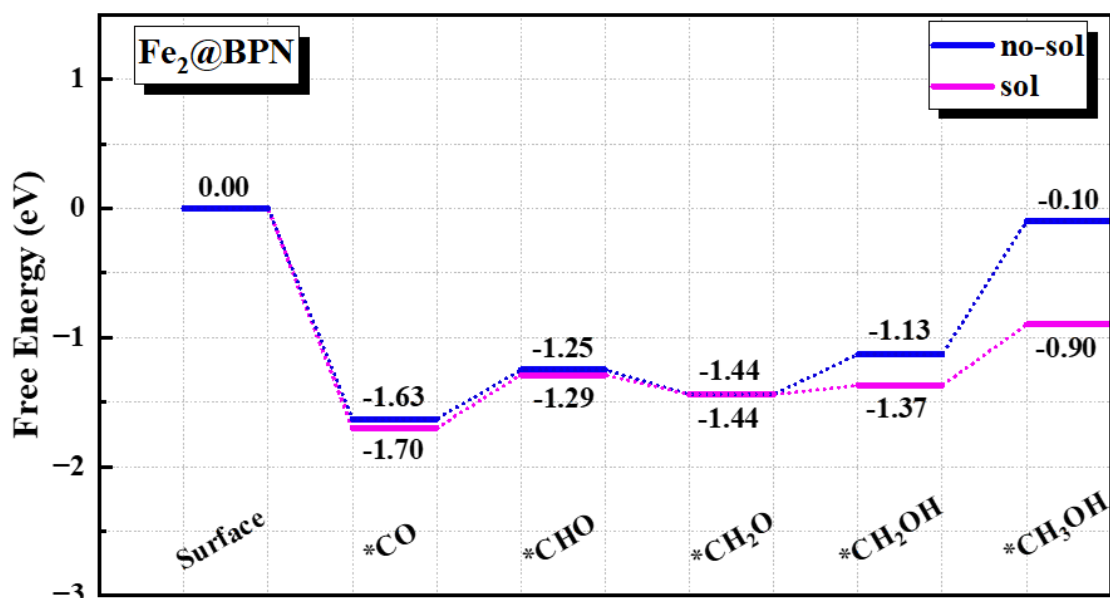

Reaction Pathway

**Fig. S34.** Free energy diagrams of CORR on Fe<sub>2</sub>@BPN without/with solvent effect along the energetically favorable pathway.



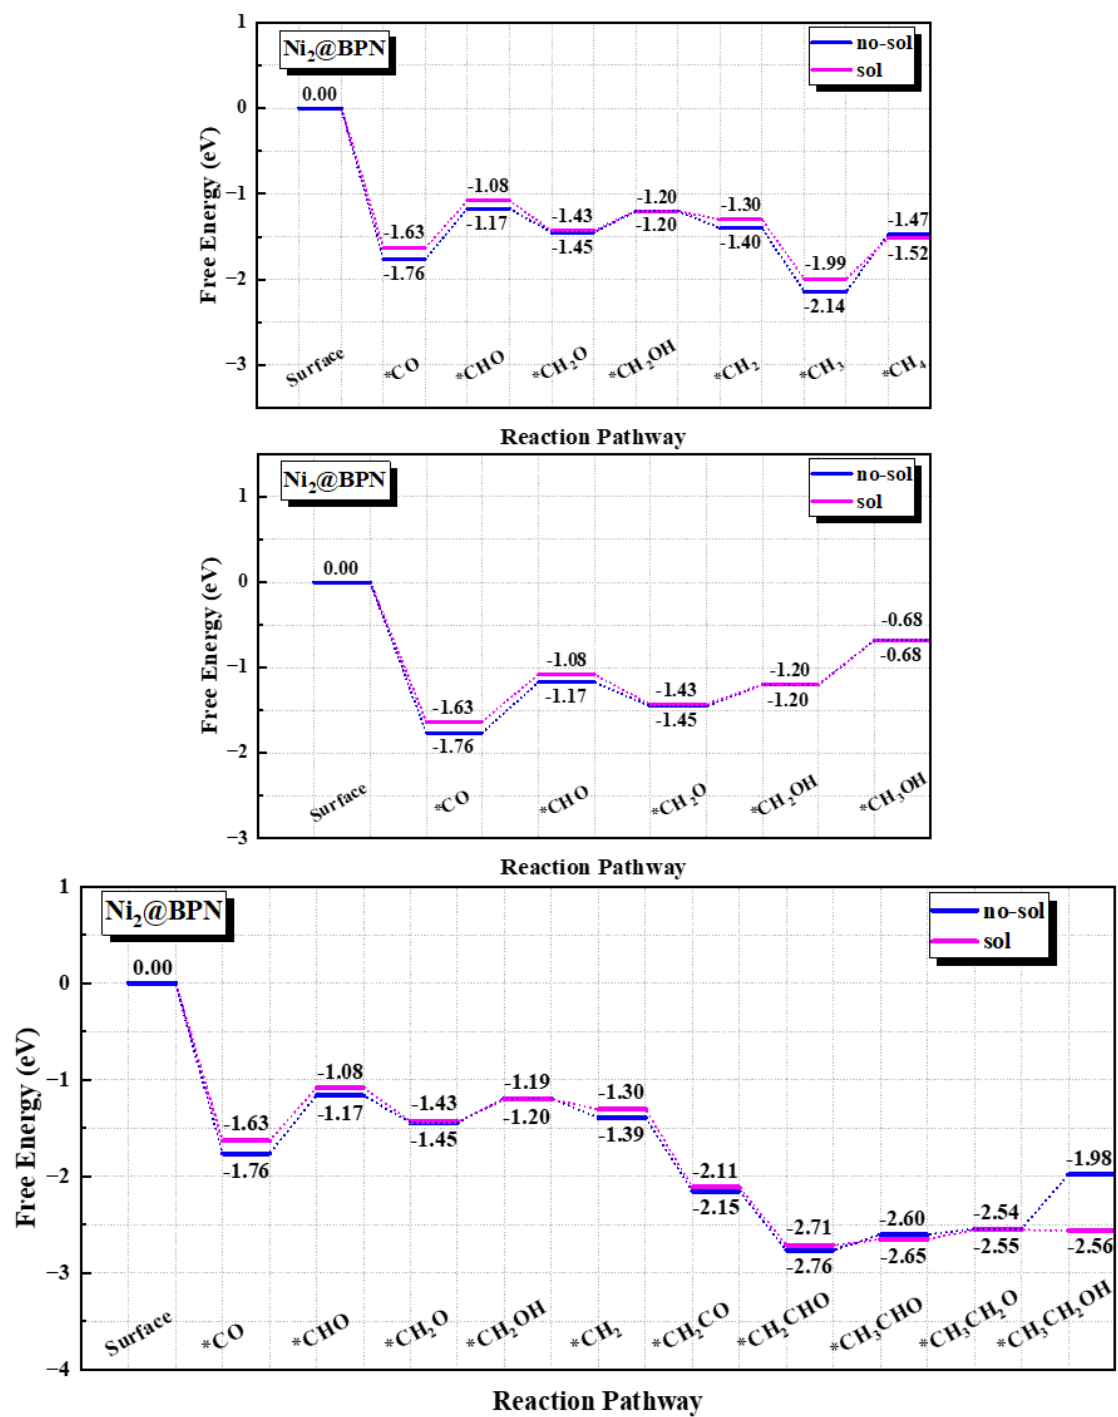

**Fig. S35.** Free energy diagrams of CORR on Ni<sub>2</sub>@BPN without/with solvent effect along the energetically favorable pathway.

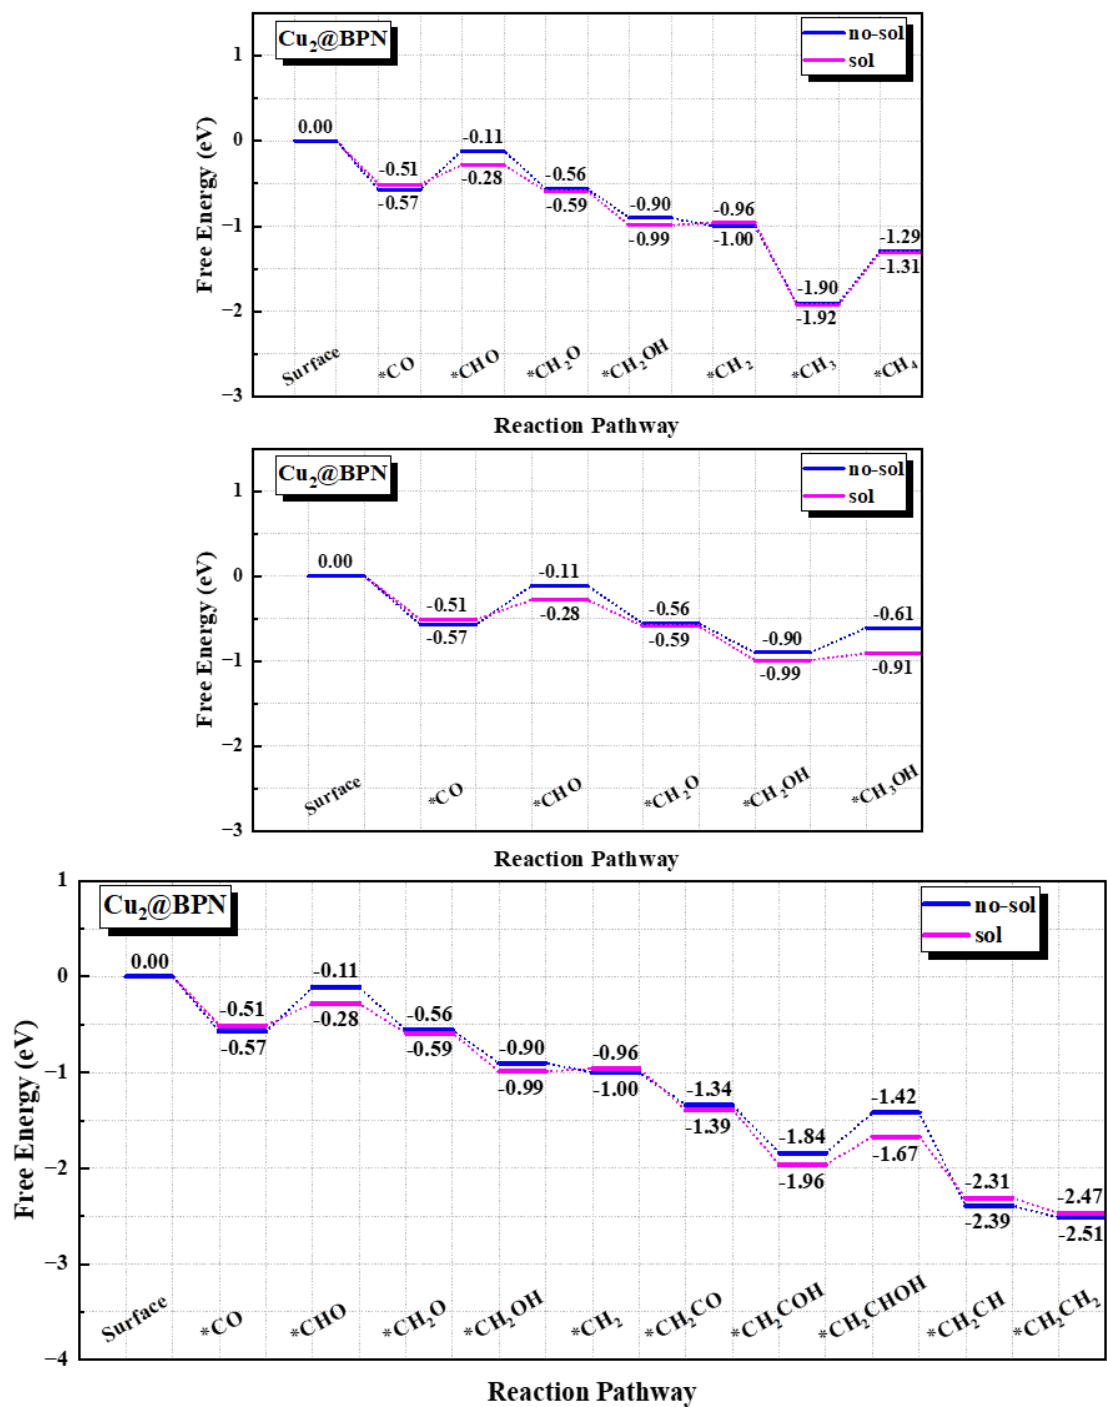

**Fig. S36.** Free energy diagrams of CORR on Cu<sub>2</sub>@BPN without/with solvent effect along the energetically favorable pathway.

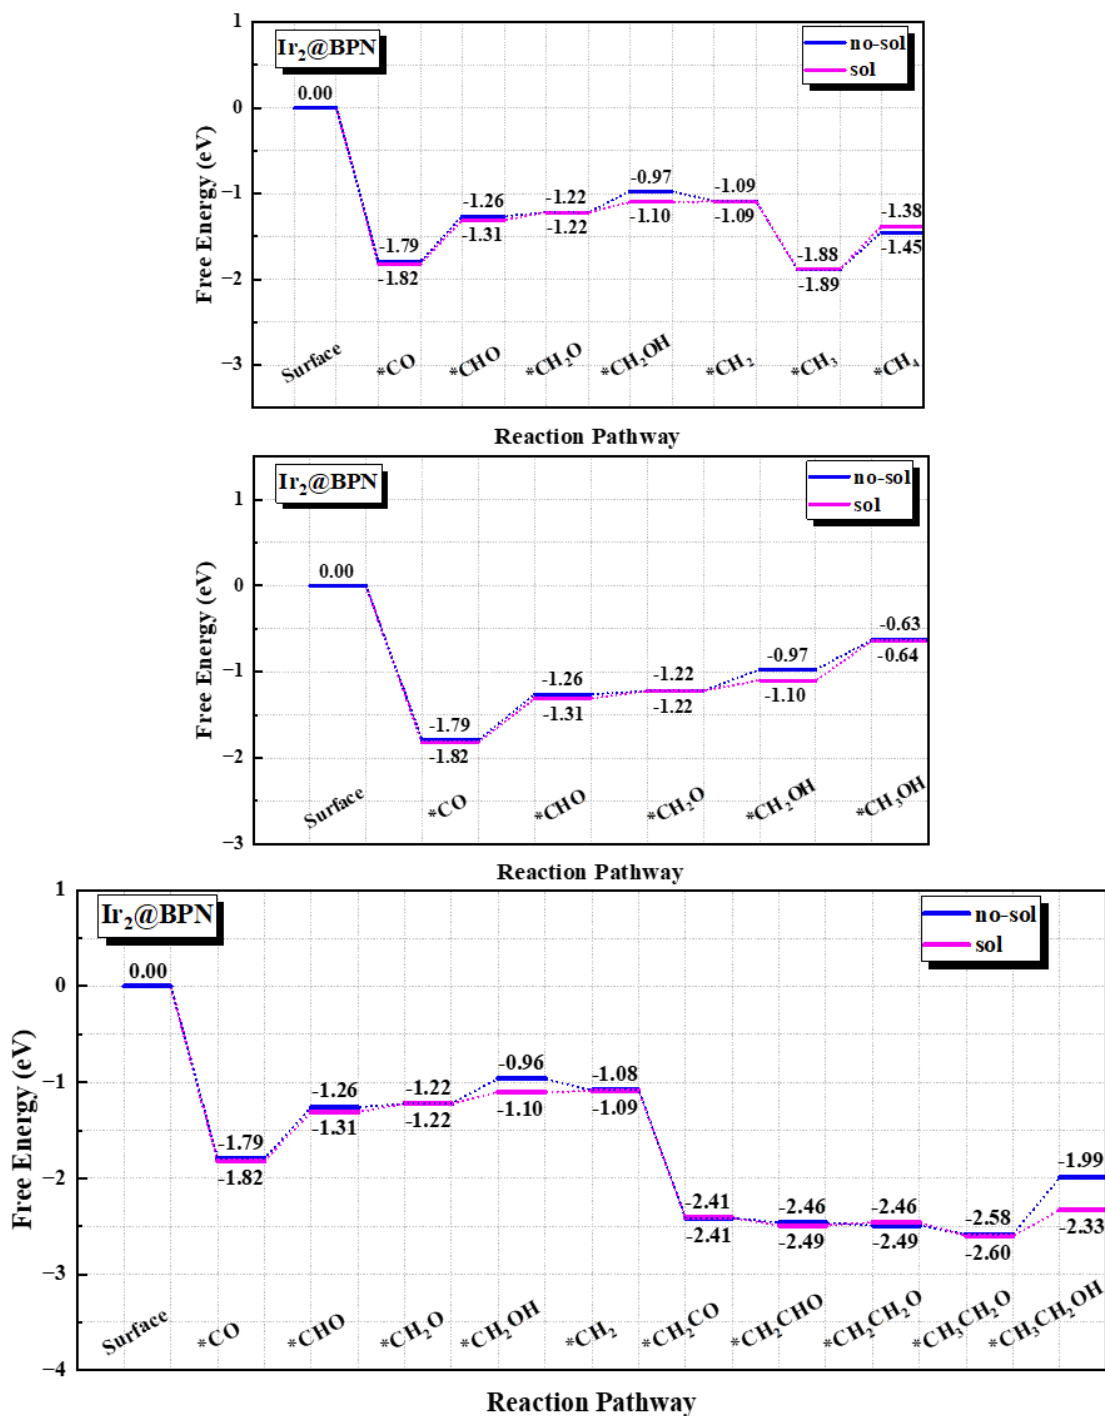

**Fig. S37.** Free energy diagrams of CORR on Ir<sub>2</sub>@BPN without/with solvent effect along the energetically favorable pathway.

**Table S1.** The most favorable configuration (conf) and relative energy in TM<sub>2</sub>@BPN. "/" indicates that this conformation does not exist.

| Metal | Conf-I (eV)       | Conf-II (eV) | Conf-III(eV)    | Conf-IV (eV)    | Conf-V (eV)       |
|-------|-------------------|--------------|-----------------|-----------------|-------------------|
| Sc    | Relax to Conf-III | 0.66         | 0               | 1.18            | 0.36              |
| Ti    | Relax to Conf-III | 0            | 0.03            | 0.63            | 1.10              |
| V     | 0.69              | 0            | /               | 1.37            | /                 |
| Cr    | 0.01              | 0            | Relax to Conf-I | 0.95            | 0.80              |
| Mn    | 1.39              | 0            | /               | 0.84            | 0.78              |
| Fe    | 0                 | 0.54         | Relax to Conf-I | 0.69            | 0.51              |
| Co    | 0                 | 0.14         | /               | 0.74            | 0.54              |
| Ni    | 0                 | 0.38         | /               | 0.83            | 0.78              |
| Cu    | 0                 | 0.37         | Relax to Conf-I | /               | 0.03              |
| Zn    | 0                 | /            | 0.01            | 0.02            | 0.01              |
| Y     | Relax to Conf-III | /            | 0               | 1.53            | 0.40              |
| Zr    | Relax to Conf-III | 0.82         | 0               | 1.31            | 0.77              |
| Nb    | Relax to Conf-III | 0.09         | 0               | 0.85            | Relax to Conf-III |
| Mo    | 0                 | 0.20         | Relax to Conf-I | 0.50            | Relax to Conf-I   |
| Ru    | 0                 | 0.28         | /               | 0.72            | 0.97              |
| Rh    | 0.01              | 0            | /               | 0.76            | 0.88              |
| Pd    | 0                 | 0.67         | Relax to Conf-I | /               | 0.56              |
| Ag    | 0                 | 0.03         | 0.01            | 0               | 0                 |
| Cd    | 0                 | /            | 0               | 0               | 0                 |
| Hf    | Relax to Conf-V   | 0.9          | 0               | 1.65            | 0.66              |
| Ta    | 0.60              | 0.28         | 0               | /               | /                 |
| W     | 0                 | 0.92         | /               | Relax to Conf-I | Relax to Conf-I   |
| Re    | 0                 | 0.50         | 0.85            | 1.18            | 1.11              |
| Os    | 0                 | 0.66         | /               | 1.18            | 1.27              |
| Ir    | 0                 | 0.70         | /               | 1.30            | 1.04              |
| Pt    | 0                 | 0.83         | Relax to Conf-I | 0.74            | 0.74              |
| Au    | 0                 | 0.02         | /               | 0               | 0                 |
| Hg    | 0                 | /            | 0               | 0.01            | 0.01              |

**Table S2.** Binding energy ( $E_b$ ) of the DACs in the most stable configuration and the cohesion energy ( $E_{coh}$ ) of the metal atoms in  $TM_2@BPN$ .

| Metal | $E_b$ (eV) | $E_{coh}$ (eV) |
|-------|------------|----------------|
| Sc    | -7.94      | -4.21          |
| Ti    | -7.77      | -5.40          |
| V     | -5.87      | -5.35          |
| Cr    | -3.06      | -4.02          |
| Mn    | -3.73      | -3.54          |
| Fe    | -4.72      | -4.84          |
| Co    | -5.08      | -5.13          |
| Ni    | -6.09      | -5.01          |
| Cu    | -3.19      | -3.48          |
| Zn    | -0.49      | -1.46          |
| Y     | -8.20      | -4.51          |
| Zr    | -10.15     | -6.36          |
| Nb    | -8.24      | -7.48          |
| Mo    | -11.54     | -9.01          |
| Ru    | -9.59      | -8.49          |
| Rh    | -7.20      | -6.53          |
| Pd    | -4.43      | -4.30          |
| Ag    | -2.09      | -2.97          |
| Cd    | -0.48      | -1.07          |
| Hf    | -9.39      | -6.88          |
| Ta    | -9.62      | -8.78          |
| W     | -9.63      | -9.53          |
| Re    | -10.08     | -9.62          |
| Os    | -8.58      | -8.91          |
| Ir    | -8.22      | -8.03          |
| Pt    | -7.12      | -6.24          |
| Au    | -2.70      | -3.63          |
| Hg    | -0.51      | -0.59          |

**Table S3.** Structural and electronic properties of TM<sub>2</sub>@BPN, including M–M bonds ( $d_{M-M}$ ),  $d$  band center ( $\epsilon_d$ ), magnetic moment (Mag), and charge transfer (CT) from metal dimer to C atoms.

| Metal | $d_{M-M}$ (Å) | $\epsilon_d$ (eV) | Mag ( $\mu_B$ ) | CT ( $e$ ) |
|-------|---------------|-------------------|-----------------|------------|
| Sc    | 4.01          | 1.47              | 1.24            | 2.25       |
| Ti    | 2.48          | 1.05              | 1.34            | 1.68       |
| V     | 2.43          | 0.40              | 3.33            | 1.49       |
| Mn    | 2.57          | -0.48             | 7.33            | 1.09       |
| Fe    | 2.17          | -0.95             | 5.32            | 0.77       |
| Co    | 2.17          | -1.19             | 2.68            | 0.58       |
| Ni    | 2.36          | -1.11             | 0.62            | 0.46       |
| Cu    | 2.35          | -2.10             | 0.00            | 0.42       |
| Y     | 4.03          | 2.06              | -1.06           | 2.55       |
| Zr    | 3.53          | 0.85              | 1.21            | 2.17       |
| Nb    | 2.61          | 0.54              | 0.93            | 1.65       |
| Mo    | 1.73          | -0.76             | 0.75            | 0.80       |
| Ru    | 2.28          | -1.13             | 2.99            | 0.48       |
| Rh    | 2.65          | -1.00             | 0.30            | 0.35       |
| Pd    | 2.67          | -1.81             | 0.00            | 0.21       |
| Hf    | 3.30          | 1.30              | 0.59            | 2.15       |
| Ta    | 2.49          | 0.86              | 0.00            | 1.56       |
| W     | 2.10          | 0.12              | 0.00            | 0.92       |
| Re    | 2.14          | -0.84             | 1.39            | 0.69       |
| Os    | 2.27          | -1.26             | 3.23            | 0.46       |
| Ir    | 2.41          | -1.46             | 1.09            | 0.19       |
| Pt    | 2.55          | -2.16             | 0.65            | 0.05       |

**Table S4.** The adsorption energy  $\Delta E$  (eV) of CO, the Gibbs free energy  $\Delta G$  (eV) of CO, the bond lengths ( $\text{\AA}$ ) of M–C and C–O ( $d_{M-C}$  and  $d_{C-O}$ ), and charge transfer (CT) from metal dimer to CO.

| Metal | $\Delta E_{*CO}$ (eV) | $\Delta G_{*CO}$ (eV) | $d_{M-C}$ ( $\text{\AA}$ ) | $d_{C-O}$ ( $\text{\AA}$ ) | CT ( $e$ ) |
|-------|-----------------------|-----------------------|----------------------------|----------------------------|------------|
| Sc    | -2.31                 | -1.69                 | 2.23                       | 1.25                       | -0.95      |
| Ti    | -2.68                 | -2.05                 | 2.03                       | 1.26                       | -1.07      |
| V     | -2.92                 | -2.32                 | 1.97                       | 1.26                       | -0.95      |
| Mn    | -2.34                 | -1.69                 | 1.95                       | 1.24                       | -0.82      |
| Fe    | -2.22                 | -1.63                 | 1.88                       | 1.23                       | -0.69      |
| Co    | -2.65                 | -2.00                 | 1.91                       | 1.19                       | -0.42      |
| Ni    | -2.34                 | -1.76                 | 1.88                       | 1.22                       | -0.52      |
| Cu    | -1.14                 | -0.57                 | 1.93                       | 1.19                       | -0.36      |
| Y     | -2.09                 | -1.47                 | 2.40                       | 1.24                       | -1.08      |
| Zr    | -2.96                 | -2.33                 | 2.25                       | 1.27                       | -1.12      |
| Nb    | -3.12                 | -2.48                 | 2.08                       | 1.28                       | -1.12      |
| Mo    | -1.13                 | -0.96                 | 2.25                       | 1.18                       | -0.44      |
| Ru    | -2.43                 | -1.80                 | 2.01                       | 1.21                       | -0.50      |
| Rh    | -2.58                 | -2.05                 | 2.04                       | 1.19                       | -0.35      |
| Pd    | -1.88                 | -1.27                 | 2.00                       | 1.18                       | -0.21      |
| Hf    | -3.03                 | -2.43                 | 2.20                       | 1.30                       | -1.21      |
| Ta    | -3.51                 | -2.85                 | 2.05                       | 1.31                       | -1.16      |
| W     | -2.24                 | -1.61                 | 2.05                       | 1.28                       | -0.85      |
| Re    | -2.25                 | -1.59                 | 1.94                       | 1.18                       | -0.38      |
| Os    | -2.50                 | -1.83                 | 1.87                       | 1.18                       | -0.28      |
| Ir    | -2.42                 | -1.79                 | 1.98                       | 1.21                       | -0.41      |
| Pt    | -2.29                 | -1.64                 | 1.86                       | 1.17                       | -0.12      |

**Table S5.** The values of the free energy change ( $\Delta G/eV$ ) at each step involved in  $Sc_2@BPN$ .

| Reaction process                              | $\Delta G$ |
|-----------------------------------------------|------------|
| $*CO + H^+ + e^- \rightarrow *CHO$            | -0.03      |
| $*CO + H^+ + e^- \rightarrow *COH$            | 1.55       |
| $*CHO + H^+ + e^- \rightarrow *CH_2O$         | -0.92      |
| $*CHO + H^+ + e^- \rightarrow *CHOH$          | 0.61       |
| $*CH_2O + H^+ + e^- \rightarrow *CH_3O$       | -0.54      |
| $*CH_2O + H^+ + e^- \rightarrow *CH_2OH$      | 1.11       |
| $*CH_3O + H^+ + e^- \rightarrow *O + CH_4(g)$ | -1.76      |
| $*CH_3O + H^+ + e^- \rightarrow *CH_3OH$      | 2.34       |
| $*O + H^+ + e^- \rightarrow *OH$              | 0.57       |
| $*OH + H^+ + e^- \rightarrow *H_2O(l)$        | 2.39       |



**Table S6.** The values of the free energy change ( $\Delta G/eV$ ) at each step involved in  $Ti_2@BPN$ .

| Reaction process                              | $\Delta G$ |
|-----------------------------------------------|------------|
| $*CO + H^+ + e^- \rightarrow *CHO$            | 0.03       |
| $*CO + H^+ + e^- \rightarrow *COH$            | 1.52       |
| $*CHO + H^+ + e^- \rightarrow *CH_2O$         | -0.41      |
| $*CHO + H^+ + e^- \rightarrow *CHOH$          | 0.87       |
| $*CH_2O + H^+ + e^- \rightarrow *CH_3O$       | -0.60      |
| $*CH_2O + H^+ + e^- \rightarrow *CH_2OH$      | 0.62       |
| $*CH_3O + H^+ + e^- \rightarrow *O + CH_4(g)$ | -1.43      |
| $*CH_3O + H^+ + e^- \rightarrow *CH_3OH$      | 2.17       |
| $*O + H^+ + e^- \rightarrow *OH$              | 0.32       |
| $*OH + H^+ + e^- \rightarrow *H_2O(l)$        | 2.17       |

**Table S7.** The values of the free energy change ( $\Delta G/eV$ ) at each step involved in  $V_2@BPN$ .

| Reaction process                              | $\Delta G$ |
|-----------------------------------------------|------------|
| $*CO + H^+ + e^- \rightarrow *CHO$            | 0.02       |
| $*CO + H^+ + e^- \rightarrow *COH$            | 1.48       |
| $*CHO + H^+ + e^- \rightarrow *CH_2O$         | -1.00      |
| $*CHO + H^+ + e^- \rightarrow *CHOH$          | 0.62       |
| $*CH_2O + H^+ + e^- \rightarrow *CH_3O$       | -0.03      |
| $*CH_2O + H^+ + e^- \rightarrow *CH_2OH$      | 1.32       |
| $*CH_3O + H^+ + e^- \rightarrow *O + CH_4(g)$ | -1.35      |
| $*CH_3O + H^+ + e^- \rightarrow *CH_3OH$      | 2.47       |
| $*O + H^+ + e^- \rightarrow *OH$              | 0.50       |
| $*OH + H^+ + e^- \rightarrow *H_2O(l)$        | 2.27       |

**Table S8.** The values of the free energy change ( $\Delta G/eV$ ) at each step involved in  $Mn_2@BPN$ .

| Reaction process                                   | $\Delta G$ |
|----------------------------------------------------|------------|
| $*CO + H^+ + e^- \rightarrow *CHO$                 | 0.13       |
| $*CO + H^+ + e^- \rightarrow *COH$                 | 1.08       |
| $*CHO + H^+ + e^- \rightarrow *CH_2O$              | -0.14      |
| $*CHO + H^+ + e^- \rightarrow *CHOH$               | 0.77       |
| $*CH_2O + H^+ + e^- \rightarrow *CH_3O$            | 0.05       |
| $*CH_2O + H^+ + e^- \rightarrow *CH_2OH$           | 0.33       |
| $*CH_3O + H^+ + e^- \rightarrow *CH_3OH$           | 1.52       |
| $*CH_2OH + H^+ + e^- \rightarrow *CH_3-OH$         | -1.27      |
| $*CH_2OH + H^+ + e^- \rightarrow *CH_2 + H_2O(l)$  | -0.19      |
| $*CH_3-OH + H^+ + e^- \rightarrow *OH + CH_4(g)$   | -0.73      |
| $*CH_3-OH + H^+ + e^- \rightarrow *CH_3 + H_2O(l)$ | 0.27       |
| $*OH + H^+ + e^- \rightarrow *H_2O$                | 2.13       |

**Table S9.** The values of the free energy change ( $\Delta G/eV$ ) at each step involved in Fe<sub>2</sub>@BPN.

| Reaction process                                   | $\Delta G$ |
|----------------------------------------------------|------------|
| $*CO + H^+ + e^- \rightarrow *CHO$                 | 0.38       |
| $*CO + H^+ + e^- \rightarrow *COH$                 | 1.37       |
| $*CHO + H^+ + e^- \rightarrow *CH_2O$              | -0.19      |
| $*CHO + H^+ + e^- \rightarrow *CHOH$               | 0.63       |
| $*CH_2O + H^+ + e^- \rightarrow *CH_3O$            | 0.21       |
| $*CH_2O + H^+ + e^- \rightarrow *CH_2OH$           | 0.31       |
| $*CH_3O + H^+ + e^- \rightarrow *CH_3OH$           | 1.13       |
| $*CH_2OH + H^+ + e^- \rightarrow *CH_3OH$          | 1.02       |
| $*CH_2OH + H^+ + e^- \rightarrow *CH_2 + H_2O (l)$ | -0.28      |
| $*CH_2 + H^+ + e^- \rightarrow *CH_3$              | -0.61      |
| $*CH_3 + H^+ + e^- \rightarrow *CH_4(g)$           | 0.62       |

**Table S10.** The values of the free energy change ( $\Delta G/eV$ ) at each step involved in Ni<sub>2</sub>@BPN.

| Reaction process                                   | $\Delta G$ |
|----------------------------------------------------|------------|
| $*CO + H^+ + e^- \rightarrow *CHO$                 | 0.59       |
| $*CO + H^+ + e^- \rightarrow *COH$                 | 1.95       |
| $*CHO + H^+ + e^- \rightarrow *CH_2O$              | -0.28      |
| $*CHO + H^+ + e^- \rightarrow *CHOH$               | 0.50       |
| $*CH_2O + H^+ + e^- \rightarrow *CH_3O$            | -0.23      |
| $*CH_2O + H^+ + e^- \rightarrow *CH_2OH$           | 0.25       |
| $*CH_3O + H^+ + e^- \rightarrow *CH_3OH$           | 1.00       |
| $*CH_2OH + H^+ + e^- \rightarrow *CH_3OH$          | 0.51       |
| $*CH_2OH + H^+ + e^- \rightarrow *CH_2 + H_2O (l)$ | -0.20      |
| $*CH_2 + H^+ + e^- \rightarrow *CH_3$              | -0.74      |
| $*CH_3 + H^+ + e^- \rightarrow *CH_4(g)$           | 0.67       |

**Table S11.** The values of the free energy change ( $\Delta G/eV$ ) at each step involved in  $\text{Cu}_2\text{@BPN}$ .

| Reaction process                                                                                    | $\Delta G$ |
|-----------------------------------------------------------------------------------------------------|------------|
| $*\text{CO} + \text{H}^+ + \text{e}^- \rightarrow *\text{CHO}$                                      | 0.46       |
| $*\text{CO} + \text{H}^+ + \text{e}^- \rightarrow *\text{COH}$                                      | 1.14       |
| $*\text{CHO} + \text{H}^+ + \text{e}^- \rightarrow *\text{CH}_2\text{O}$                            | -0.45      |
| $*\text{CHO} + \text{H}^+ + \text{e}^- \rightarrow *\text{CHOH}$                                    | 0.03       |
| $*\text{CH}_2\text{O} + \text{H}^+ + \text{e}^- \rightarrow *\text{CH}_3\text{O}$                   | -0.30      |
| $*\text{CH}_2\text{O} + \text{H}^+ + \text{e}^- \rightarrow *\text{CH}_2\text{OH}$                  | -0.34      |
| $*\text{CH}_3\text{O} + \text{H}^+ + \text{e}^- \rightarrow *\text{CH}_3\text{OH}$                  | 0.33       |
| $*\text{CH}_2\text{OH} + \text{H}^+ + \text{e}^- \rightarrow *\text{CH}_3\text{OH}$                 | 0.29       |
| $*\text{CH}_2\text{OH} + \text{H}^+ + \text{e}^- \rightarrow *\text{CH}_2 + \text{H}_2\text{O} (l)$ | -0.10      |
| $*\text{CH}_2 + \text{H}^+ + \text{e}^- \rightarrow *\text{CH}_3$                                   | -0.90      |
| $*\text{CH}_3 + \text{H}^+ + \text{e}^- \rightarrow *\text{CH}_4$                                   | 0.61       |

**Table S12.** The values of the free energy change ( $\Delta G/eV$ ) at each step involved in  $Y_2@BPN$ .

| Reaction process                         | $\Delta G$ |
|------------------------------------------|------------|
| $*CO + H^+ + e^- \rightarrow *CHO$       | -0.19      |
| $*CO + H^+ + e^- \rightarrow *COH$       | 1.63       |
| $*CHO + H^+ + e^- \rightarrow *CH_2O$    | -0.72      |
| $*CHO + H^+ + e^- \rightarrow *CHOH$     | 0.78       |
| $*CH_2O + H^+ + e^- \rightarrow *CH_3O$  | -0.48      |
| $*CH_2O + H^+ + e^- \rightarrow *CH_2OH$ | 0.98       |
| $*CH_3O + H^+ + e^- \rightarrow *CH_3OH$ | 1.90       |

**Table S13.** The values of the free energy change ( $\Delta G/eV$ ) at each step involved in Nb<sub>2</sub>@BPN.

| Reaction process                         | $\Delta G$ |
|------------------------------------------|------------|
| $*CO + H^+ + e^- \rightarrow *CHO$       | -0.12      |
| $*CO + H^+ + e^- \rightarrow *COH$       | 0.97       |
| $*CHO + H^+ + e^- \rightarrow *CH_2O$    | 0.10       |
| $*CHO + H^+ + e^- \rightarrow *CHOH$     | 1.11       |
| $*CH_2O + H^+ + e^- \rightarrow *CH_3O$  | 0.44       |
| $*CH_2O + H^+ + e^- \rightarrow *CH_2OH$ | 1.29       |
| $*CH_3O + H^+ + e^- \rightarrow *CH_3OH$ | 1.37       |



**Table S14.** The values of the free energy change ( $\Delta G/eV$ ) at each step involved in Ta<sub>2</sub>@BPN.

| Reaction process                                    | $\Delta G$ |
|-----------------------------------------------------|------------|
| $*CO + H^+ + e^- \rightarrow *CHO$                  | -0.14      |
| $*CO + H^+ + e^- \rightarrow *COH$                  | 1.04       |
| $*CHO + H^+ + e^- \rightarrow *CH_2O$               | 0.03       |
| $*CHO + H^+ + e^- \rightarrow *CHOH$                | 1.26       |
| $*CH_2O + H^+ + e^- \rightarrow *CH_3-O$            | -1.22      |
| $*CH_2O + H^+ + e^- \rightarrow *CH_2-OH$           | -1.53      |
| $*CH_2-OH + H^+ + e^- \rightarrow *CH_3-OH$         | 0.40       |
| $*CH_2-OH + H^+ + e^- \rightarrow *CH_2-H_2O (l)$   | 1.92       |
| $*CH_3-OH + H^+ + e^- \rightarrow *OH + CH_4(g)$    | 0.50       |
| $*CH_3-OH + H^+ + e^- \rightarrow *CH_3 + H_2O (l)$ | 2.09       |
| $*OH + H^+ + e^- \rightarrow *H_2O (l)$             | 1.35       |

**Table S15.** The values of the free energy change ( $\Delta G/eV$ ) at each step involved in  $W_2@BPN$ .

| Reaction process                                  | $\Delta G$ |
|---------------------------------------------------|------------|
| $*CO + H^+ + e^- \rightarrow *CHO$                | 0.10       |
| $*CO + H^+ + e^- \rightarrow *COH$                | 1.13       |
| $*CHO + H^+ + e^- \rightarrow *CH_2O$             | -0.70      |
| $*CHO + H^+ + e^- \rightarrow *CHOH$              | 0.96       |
| $*CH_2O + H^+ + e^- \rightarrow *CH_3O$           | 0.47       |
| $*CH_2O + H^+ + e^- \rightarrow *CH_2-OH$         | -1.19      |
| $*CH_3O + H^+ + e^- \rightarrow *CH_3OH$          | 0.89       |
| $*CH_2-OH + H^+ + e^- \rightarrow *CH_2-H_2O$ (l) | 1.65       |
| $*CH_2 + H^+ + e^- \rightarrow *CH_3$             | -0.01      |
| $*CH_3 + H^+ + e^- \rightarrow *CH_4$             | 0.45       |

**Table S16.** The values of the free energy change ( $\Delta G/eV$ ) at each step involved in Ir<sub>2</sub>@BPN.

| Reaction process                                 | $\Delta G$ |
|--------------------------------------------------|------------|
| $*CO + H^+ + e^- \rightarrow *CHO$               | 0.53       |
| $*CO + H^+ + e^- \rightarrow *COH$               | 0.67       |
| $*CHO + H^+ + e^- \rightarrow *CH_2O$            | 0.04       |
| $*CHO + H^+ + e^- \rightarrow *CHOH$             | 0.17       |
| $*CH_2O + H^+ + e^- \rightarrow *CH_3O$          | -0.11      |
| $*CH_2O + H^+ + e^- \rightarrow *CH_2OH$         | 0.25       |
| $*CH_3O + H^+ + e^- \rightarrow *CH_3OH$         | 0.70       |
| $*CH_2OH + H^+ + e^- \rightarrow *CH_2-H_2O (l)$ | -0.12      |
| $*CH_2 + H^+ + e^- \rightarrow *CH_3$            | 0.28       |
| $*CH_3 + H^+ + e^- \rightarrow *CH_4$            | 0.28       |

**Table S17.** Gibbs free energy change ( $\Delta G/eV$ ) of formation for C–C coupling via  $^*CO.CO$ ,  $^*CHO.CO$ , and  $^*CH_2.CO$  intermediates on  $TM_2@BPN$ .

| system | $^*CO.CO \rightarrow$<br>$^*CO-CO$ | $^*CHO.CO \rightarrow$<br>$^*CHO-CO$ | $^*CH_2.CO \rightarrow$<br>$^*CH_2CO$ |
|--------|------------------------------------|--------------------------------------|---------------------------------------|
| Sc     | -0.69                              | -1.41                                | —                                     |
| V      | 0.28                               | 0.76                                 | —                                     |
| Ni     | 1.65                               | 0.81                                 | -0.76                                 |
| Cu     | 1.31                               | —                                    | -0.34                                 |
| Y      | -0.69                              | -0.06                                | —                                     |
| Zr     | -0.30                              | —                                    | —                                     |
| Hf     | -0.37                              | —                                    | —                                     |
| W      | 1.38                               | —                                    | —                                     |
| Ir     | —                                  | —                                    | -1.33                                 |

**Table S18.** The values of the free energy change ( $\Delta G/eV$ ) at each step involved in  $Sc_2@BPN$ .

| Reaction process                                           | $\Delta G$ |
|------------------------------------------------------------|------------|
| $*CO + H^+ + e^- \rightarrow *CHO$                         | -0.03      |
| $*CHO + CO \rightarrow *CHO.CO$                            | -0.45      |
| $*CHO.CO \rightarrow *CHOCO$                               | -1.86      |
| $*CHOCO + H^+ + e^- \rightarrow *CH_2OCO$                  | 0.09       |
| $*CHOCO + H^+ + e^- \rightarrow *CHOHCO$                   | 0.46       |
| $*CHOCO + H^+ + e^- \rightarrow *CHOCHO$                   | -0.78      |
| $*CHOCO + H^+ + e^- \rightarrow *CHOCOH$                   | 0.58       |
| $*CHOCHO + H^+ + e^- \rightarrow *CH_2OCHO$                | 0.6        |
| $*CHOCHO + H^+ + e^- \rightarrow *CHOHCHO$                 | 1.06       |
| $*CHOCHO + H^+ + e^- \rightarrow *CHOCH_2O$                | 0.79       |
| $*CHOCHO + H^+ + e^- \rightarrow *CHOCHOH$                 | 1.03       |
| $*CH_2OCHO + H^+ + e^- \rightarrow *CH_2OHCHO$             | 0.48       |
| $*CH_2OCHO + H^+ + e^- \rightarrow *CH_2OCH_2O$            | -1.00      |
| $*CH_2OCHO + H^+ + e^- \rightarrow *CH_2OCHOH$             | 0.51       |
| $*CH_2OCH_2O + H^+ + e^- \rightarrow *CH_2OHCH_2O$         | 0.73       |
| $*CH_2OCH_2O + H^+ + e^- \rightarrow *CH_2OCH_2OH$         | 1.10       |
| $*CH_2OHCH_2O + H^+ + e^- \rightarrow *CH_3CH_2O-OH$       | 0.10       |
| $*CH_2OHCH_2O + H^+ + e^- \rightarrow *CH_2OHCH_2OH$       | 2.11       |
| $*CH_3CH_2O-OH + H^+ + e^- \rightarrow *OH+CH_3CH_2OH(l)$  | -0.58      |
| $*CH_3CH_2O-OH + H^+ + e^- \rightarrow *CH_3CH_2O+H_2O(l)$ | -0.45      |
| $*OH + H^+ + e^- \rightarrow *H_2O$                        | 2.34       |

**Table S19.** The values of the free energy change ( $\Delta G/eV$ ) at each step involved in  $V_2@BPN$ .

| Reaction process                                           | $\Delta G$ |
|------------------------------------------------------------|------------|
| $*CO + CO \rightarrow *CO.CO$                              | -1.01      |
| $*CO.CO \rightarrow *COCO$                                 | 0.28       |
| $*COCO + H^+ + e^- \rightarrow *CHOCO$                     | 0.41       |
| $*COCO + H^+ + e^- \rightarrow *COHCO$                     | 1.06       |
| $*COCO + H^+ + e^- \rightarrow *COCHO$                     | -0.71      |
| $*COCO + H^+ + e^- \rightarrow *COCO H$                    | 1.34       |
| $*COCHO + H^+ + e^- \rightarrow *CHOCHO$                   | -0.55      |
| $*COCHO + H^+ + e^- \rightarrow *COHCHO$                   | 0.89       |
| $*COCHO + H^+ + e^- \rightarrow *COCH_2O$                  | -0.40      |
| $*COCHO + H^+ + e^- \rightarrow *COCHOH$                   | 0.85       |
| $*CHOCHO + H^+ + e^- \rightarrow *CH_2OCHO$                | -0.44      |
| $*CHOCHO + H^+ + e^- \rightarrow *CHOHCHO$                 | 0.55       |
| $*CHOCHO + H^+ + e^- \rightarrow *CHOCH_2O$                | -0.05      |
| $*CHOCHO + H^+ + e^- \rightarrow *CHOCHOH$                 | 0.99       |
| $*CH_2OCHO + H^+ + e^- \rightarrow *CH_2OHCHO$             | 0.75       |
| $*CH_2OCHO + H^+ + e^- \rightarrow *CH_2OCH_2O$            | -0.42      |
| $*CH_2OCHO + H^+ + e^- \rightarrow *CH_2OCHOH$             | 1.09       |
| $*CH_2OCH_2O + H^+ + e^- \rightarrow *CH_2OHCH_2O$         | 1.37       |
| $*CH_2OCH_2O + H^+ + e^- \rightarrow *CH_2OCH_2OH$         | 1.19       |
| $*CH_2OCH_2OH + H^+ + e^- \rightarrow *CH_3CH_2O-OH$       | -1.77      |
| $*CH_2OCH_2OH + H^+ + e^- \rightarrow *CH_2OHCH_2OH$       | 1.94       |
| $*CH_3CH_2O-OH + H^+ + e^- \rightarrow *OH+CH_3CH_2OH(l)$  | 2.08       |
| $*CH_3CH_2O-OH + H^+ + e^- \rightarrow *CH_3CH_2O+H_2O(l)$ | 1.45       |
| $*CH_3CH_2O + H^+ + e^- \rightarrow *CH_3CH_2OH$           | 2.12       |

**Table S20.** The values of the free energy change ( $\Delta G/eV$ ) at each step involved in Ni<sub>2</sub>@BPN.

| Reaction process                                  | $\Delta G$ |
|---------------------------------------------------|------------|
| $*CO + H^+ + e^- \rightarrow *CHO$                | 0.59       |
| $*CHO + H^+ + e^- \rightarrow *CH_2O$             | -0.28      |
| $*CH_2O + H^+ + e^- \rightarrow *CH_2OH$          | 0.25       |
| $*CH_2OH + H^+ + e^- \rightarrow *CH_3OH$         | 0.52       |
| $*CH_2OH + H^+ + e^- \rightarrow *CH_2 + H_2O(l)$ | -0.20      |
| $*CH_2 + CO \rightarrow *CH_2CO$                  | -0.76      |
| $*CH_2CO + H^+ + e^- \rightarrow *CH_2CHO$        | -0.61      |
| $*CH_2CO + H^+ + e^- \rightarrow *CH_2COH$        | 0.05       |
| $*CH_2CHO + H^+ + e^- \rightarrow *CH_3CHO$       | 0.16       |
| $*CH_2CHO + H^+ + e^- \rightarrow *CH_2CH_2O$     | 0.79       |
| $*CH_2CHO + H^+ + e^- \rightarrow *CH_2CHOH$      | 0.38       |
| $*CH_3CHO + H^+ + e^- \rightarrow *CH_3CH_2O$     | 0.06       |
| $*CH_3CHO + H^+ + e^- \rightarrow *CH_3CHOH$      | 0.30       |
| $*CH_3CH_2O + H^+ + e^- \rightarrow *CH_3CH_2OH$  | 0.56       |

**Table S21.** The values of the free energy change ( $\Delta G/eV$ ) at each step involved in  $Cu_2@BPN$ .

| Reaction process                                      | $\Delta G$ |
|-------------------------------------------------------|------------|
| $*CO + H^+ + e^- \rightarrow *CHO$                    | 0.46       |
| $*CHO + H^+ + e^- \rightarrow *CH_2O$                 | -0.45      |
| $*CHO + H^+ + e^- \rightarrow *CHOH$                  | 0.03       |
| $*CH_2O + H^+ + e^- \rightarrow *CH_3O$               | -0.30      |
| $*CH_2O + H^+ + e^- \rightarrow *CH_2OH$              | -0.34      |
| $*CH_2OH + H^+ + e^- \rightarrow *CH_3OH$             | 0.30       |
| $*CH_2OH + H^+ + e^- \rightarrow *CH_2 + H_2O(l)$     | -0.10      |
| $*CH_2 + CO \rightarrow *CH_2CO$                      | -0.34      |
| $*CH_2CO + H^+ + e^- \rightarrow *CH_3CO$             | -0.30      |
| $*CH_2CO + H^+ + e^- \rightarrow *CH_2COH$            | -0.50      |
| $*CH_2COH + H^+ + e^- \rightarrow *CH_3COH$           | 0.57       |
| $*CH_2COH + H^+ + e^- \rightarrow *CH_2CHOH$          | 0.42       |
| $*CH_2COH + H^+ + e^- \rightarrow *CH_2C + H_2O(l)$   | 0.73       |
| $*CH_2CHOH + H^+ + e^- \rightarrow *CH_3CHOH$         | -0.09      |
| $*CH_2CHOH + H^+ + e^- \rightarrow *CH_2CH_2OH$       | -0.73      |
| $*CH_2CHOH + H^+ + e^- \rightarrow *CH_2CH + H_2O(l)$ | -0.97      |
| $*CH_2CH + H^+ + e^- \rightarrow *CH_2CH_2$           | -0.12      |



**Table S22.** The values of the free energy change ( $\Delta G/eV$ ) at each step involved in  $Y_2@BPN$ .

| Reaction process                                             | $\Delta G$ |
|--------------------------------------------------------------|------------|
| $*CO + H^+ + e^- \rightarrow *CHO$                           | -0.19      |
| $*CHO + CO \rightarrow *CHO.CO$                              | -0.23      |
| $*CHO.CO \rightarrow *CHOCO$                                 | -0.06      |
| $*CHOCO + H^+ + e^- \rightarrow *CHOHCO$                     | -0.97      |
| $*CHOCO + H^+ + e^- \rightarrow *CHOCHO$                     | -2.39      |
| $*CHOCO + H^+ + e^- \rightarrow *CHOCOH$                     | -0.73      |
| $*CHOCHO + H^+ + e^- \rightarrow *CH_2OCHO$                  | 0.59       |
| $*CHOCHO + H^+ + e^- \rightarrow *CHOHCHO$                   | 1.04       |
| $*CHOCHO + H^+ + e^- \rightarrow *CHOCH_2O$                  | 0.57       |
| $*CHOCHO + H^+ + e^- \rightarrow *CHOCHOH$                   | 1.09       |
| $*CHOCH_2O + H^+ + e^- \rightarrow *CH_2OCH_2O$              | -0.53      |
| $*CHOCH_2O + H^+ + e^- \rightarrow *CHOHCH_2O$               | 0.53       |
| $*CHOCH_2O + H^+ + e^- \rightarrow *CHOCH_2OH$               | 0.59       |
| $*CH_2OCH_2O + H^+ + e^- \rightarrow *CH_2OHCH_2O$           | 0.63       |
| $*CH_2OCH_2O + H^+ + e^- \rightarrow *CH_2OCH_2OH$           | 0.51       |
| $*CH_2OCH_2OH + H^+ + e^- \rightarrow *CH_3CH_2O-OH$         | -1.72      |
| $*CH_2OCH_2OH + H^+ + e^- \rightarrow *CH_2OHCH_2OH$         | 2.26       |
| $*CH_3CH_2O-OH + H^+ + e^- \rightarrow *OH+CH_3CH_2OH(l)$    | 1.31       |
| $*CH_3CH_2O-OH + H^+ + e^- \rightarrow *CH_3CH_2O + H_2O(l)$ | 1.51       |
| $*OH + H^+ + e^- \rightarrow *H_2O$                          | 2.25       |

**Table S23.** The values of the free energy change ( $\Delta G/eV$ ) at each step involved in  $Zr_2@BPN$ .

| Reaction process                                             | $\Delta G$ |
|--------------------------------------------------------------|------------|
| $*CO + CO \rightarrow *CO.CO$                                | -0.69      |
| $*CO.CO \rightarrow *COCO$                                   | -0.30      |
| $*COCO + H^+ + e^- \rightarrow *CHOCO$                       | -1.04      |
| $*COCO + H^+ + e^- \rightarrow *COHCO$                       | 1.08       |
| $*COCO + H^+ + e^- \rightarrow *COCHO$                       | 0.50       |
| $*COCO + H^+ + e^- \rightarrow *COCOH$                       | 0.96       |
| $*CHOCO + H^+ + e^- \rightarrow *CH_2OCO$                    | 0.6        |
| $*CHOCO + H^+ + e^- \rightarrow *CHOHCO$                     | 0.89       |
| $*CHOCO + H^+ + e^- \rightarrow *CHOCHO$                     | -0.16      |
| $*CHOCO + H^+ + e^- \rightarrow *CHOCOH$                     | 0.88       |
| $*CHOCHO + H^+ + e^- \rightarrow *CH_2OCHO$                  | -0.13      |
| $*CHOCHO + H^+ + e^- \rightarrow *CHOHCHO$                   | 0.93       |
| $*CHOCHO + H^+ + e^- \rightarrow *CHOCH_2O$                  | -0.12      |
| $*CHOCHO + H^+ + e^- \rightarrow *CHOCHOH$                   | 1.49       |
| $*CH_2OCHO + H^+ + e^- \rightarrow *CH_2OHCHO$               | 0.94       |
| $*CH_2OCHO + H^+ + e^- \rightarrow *CH_2OCH_2O$              | -0.49      |
| $*CH_2OCHO + H^+ + e^- \rightarrow *CH_2OCHOH$               | 1.25       |
| $*CH_2OCH_2O + H^+ + e^- \rightarrow *CH_2OHCH_2O$           | 1.50       |
| $*CH_2OCH_2O + H^+ + e^- \rightarrow *CH_2OCH_2OH$           | 1.37       |
| $*CH_2OCH_2OH + H^+ + e^- \rightarrow *CH_3CH_2O.OH$         | -1.96      |
| $*CH_3CH_2O.OH + H^+ + e^- \rightarrow *OH+CH_3CH_2OH(l)$    | 2.01       |
| $*CH_3CH_2O.OH + H^+ + e^- \rightarrow *CH_3CH_2O+ H_2O (l)$ | 2.15       |
| $*OH + H^+ + e^- \rightarrow *H_2O$                          | 1.37       |

**Table S24.** The values of the free energy change ( $\Delta G/eV$ ) at each step involved in  $Hf_2@BPN$ .

| Reaction process                                             | $\Delta G$ |
|--------------------------------------------------------------|------------|
| $*CO + CO \rightarrow *CO.CO$                                | -0.86      |
| $*CO.CO \rightarrow *COCO$                                   | -0.37      |
| $*COCO + H^+ + e^- \rightarrow *CHOCO$                       | 0.52       |
| $*COCO + H^+ + e^- \rightarrow *COHCO$                       | 1.04       |
| $*COCO + H^+ + e^- \rightarrow *COCHO$                       | -1.23      |
| $*COCO + H^+ + e^- \rightarrow *COCO H$                      | 1.06       |
| $*COCHO + H^+ + e^- \rightarrow *CHOCHO$                     | 0.04       |
| $*COCHO + H^+ + e^- \rightarrow *COHCHO$                     | 1.10       |
| $*COCHO + H^+ + e^- \rightarrow *COCH_2O$                    | 0.63       |
| $*COCHO + H^+ + e^- \rightarrow *COCHOH$                     | 1.13       |
| $*CHOCHO + H^+ + e^- \rightarrow *CH_2OCHO$                  | -0.22      |
| $*CHOCHO + H^+ + e^- \rightarrow *CHOHCHO$                   | 1.63       |
| $*CHOCHO + H^+ + e^- \rightarrow *CHOCH_2O$                  | -0.21      |
| $*CHOCHO + H^+ + e^- \rightarrow *CHOCHOH$                   | 1.05       |
| $*CH_2OCHO + H^+ + e^- \rightarrow *CH_2OHCHO$               | 1.07       |
| $*CH_2OCHO + H^+ + e^- \rightarrow *CH_2OCH_2O$              | -0.65      |
| $*CH_2OCHO + H^+ + e^- \rightarrow *CH_2OCHOH$               | 1.17       |
| $*CH_2OCH_2O + H^+ + e^- \rightarrow *CH_2OHCH_2O$           | 1.81       |
| $*CH_2OCH_2O + H^+ + e^- \rightarrow *CH_2OCH_2OH$           | 1.71       |
| $*CH_2OCH_2OH + H^+ + e^- \rightarrow *CH_3CH_2O.OH$         | -2.41      |
| $*CH_2OCH_2OH + H^+ + e^- \rightarrow *CH_2OHCH_2OH$         | 1.83       |
| $*CH_3CH_2O.OH + H^+ + e^- \rightarrow *OH + CH_3CH_2OH(l)$  | 2.39       |
| $*CH_3CH_2O.OH + H^+ + e^- \rightarrow *CH_3CH_2O + H_2O(l)$ | 2.50       |
| $*OH + H^+ + e^- \rightarrow *H_2O$                          | 1.54       |

**Table S25.** The values of the free energy change ( $\Delta G/eV$ ) at each step involved in Ir<sub>2</sub>@BPN.

| Reaction process                                 | $\Delta G$ |
|--------------------------------------------------|------------|
| $*CO + H^+ + e^- \rightarrow *CHO$               | 0.53       |
| $*CHO + H^+ + e^- \rightarrow *CH_2O$            | 0.04       |
| $*CHO + H^+ + e^- \rightarrow *CHOH$             | 0.17       |
| $*CH_2O + H^+ + e^- \rightarrow *CH_2OH$         | 0.26       |
| $*CH_2OH + H^+ + e^- \rightarrow *CH_2+H_2O(l)$  | -0.12      |
| $*CH_2 + CO \rightarrow *CH_2CO$                 | -1.33      |
| $*CH_2CO + H^+ + e^- \rightarrow *CH_2CHO$       | -0.05      |
| $*CH_2CO + H^+ + e^- \rightarrow *CH_2COH$       | 0.09       |
| $*CH_2CHO + H^+ + e^- \rightarrow *CH_3CHO$      | 0.25       |
| $*CH_2CHO + H^+ + e^- \rightarrow *CH_2CH_2O$    | -0.03      |
| $*CH_2CHO + H^+ + e^- \rightarrow *CH_2CHOH$     | 0.41       |
| $*CH_2CH_2O + H^+ + e^- \rightarrow *CH_3CH_2O$  | -0.09      |
| $*CH_2CH_2O + H^+ + e^- \rightarrow *CH_2CH_2OH$ | 0.20       |
| $*CH_3CH_2O + H^+ + e^- \rightarrow *CH_3CH_2OH$ | 0.59       |

**Table S26.** The PDS and  $\Delta G_{max}$  (eV) for products of CH<sub>4</sub>, CH<sub>3</sub>OH, CH<sub>2</sub>CH<sub>2</sub>, and CH<sub>3</sub>CH<sub>2</sub>OH on TM<sub>2</sub>@BPN.

| Systems              | PDS                                                                      | $\Delta G_{max}$ | Products                           |
|----------------------|--------------------------------------------------------------------------|------------------|------------------------------------|
| Sc <sub>2</sub> @BPN | *CH <sub>3</sub> O → *CH <sub>3</sub> OH                                 | 2.34             | CH <sub>3</sub> OH                 |
|                      | *OH → *H <sub>2</sub> O                                                  | 2.39             | CH <sub>4</sub>                    |
|                      | *OH → *H <sub>2</sub> O                                                  | 2.34             | CH <sub>3</sub> CH <sub>2</sub> OH |
| Ti <sub>2</sub> @BPN | *CH <sub>3</sub> O → *CH <sub>3</sub> OH                                 | 2.17             | CH <sub>3</sub> OH                 |
|                      | *OH → *H <sub>2</sub> O                                                  | 2.17             | CH <sub>4</sub>                    |
| V <sub>2</sub> @BPN  | *CH <sub>3</sub> O → *CH <sub>3</sub> OH                                 | 2.47             | CH <sub>3</sub> OH                 |
|                      | *OH → *H <sub>2</sub> O                                                  | 2.27             | CH <sub>4</sub>                    |
|                      | *CH <sub>3</sub> CH <sub>2</sub> O → *CH <sub>3</sub> CH <sub>2</sub> OH | 2.12             | CH <sub>3</sub> CH <sub>2</sub> OH |
| Mn <sub>2</sub> @BPN | *CH <sub>3</sub> O → *CH <sub>3</sub> OH                                 | 1.52             | CH <sub>3</sub> OH                 |
|                      | *OH → *H <sub>2</sub> O                                                  | 2.13             | CH <sub>4</sub>                    |
| Fe <sub>2</sub> @BPN | *CH <sub>2</sub> OH → *CH <sub>3</sub> OH                                | 1.03             | CH <sub>3</sub> OH                 |
|                      | *CH <sub>3</sub> → *CH <sub>4</sub>                                      | 0.62             | CH <sub>4</sub>                    |
| Ni <sub>2</sub> @BPN | *CO → *CHO                                                               | 0.59             | CH <sub>3</sub> OH                 |
|                      | *CH <sub>3</sub> → *CH <sub>4</sub>                                      | 0.67             | CH <sub>4</sub>                    |
|                      | *CO → *CHO                                                               | 0.59             | CH <sub>3</sub> CH <sub>2</sub> OH |
| Cu <sub>2</sub> @BPN | *CO → *CHO                                                               | 0.46             | CH <sub>3</sub> OH                 |
|                      | *CH <sub>3</sub> → *CH <sub>4</sub>                                      | 0.61             | CH <sub>4</sub>                    |
|                      | *CO → *CHO                                                               | 0.46             | CH <sub>2</sub> CH <sub>2</sub>    |
| Y <sub>2</sub> @BPN  | *CH <sub>3</sub> O → *CH <sub>3</sub> OH                                 | 1.90             | CH <sub>3</sub> OH                 |
|                      | *OH → *H <sub>2</sub> O                                                  | 2.25             | CH <sub>3</sub> CH <sub>2</sub> OH |
| Zr <sub>2</sub> @BPN | *CH <sub>3</sub> CH <sub>2</sub> .OH → *OH                               | 2.01             | CH <sub>3</sub> CH <sub>2</sub> OH |

---

|                      |                                                                          |      |                                    |
|----------------------|--------------------------------------------------------------------------|------|------------------------------------|
| Nb <sub>2</sub> @BPN | *CH <sub>3</sub> O → *CH <sub>3</sub> OH                                 | 1.37 | CH <sub>3</sub> OH                 |
| Hf <sub>2</sub> @BPN | *CH <sub>3</sub> CH <sub>2</sub> .OH → *OH                               | 2.39 | CH <sub>3</sub> CH <sub>2</sub> OH |
| Ta <sub>2</sub> @BPN | *OH → *H <sub>2</sub> O                                                  | 1.35 | CH <sub>4</sub>                    |
| W <sub>2</sub> @BPN  | *CH <sub>3</sub> O → *CH <sub>3</sub> OH                                 | 0.89 | CH <sub>3</sub> OH                 |
|                      | *CH <sub>2</sub> -OH → *CH <sub>2</sub>                                  | 1.65 | CH <sub>4</sub>                    |
| Ir <sub>2</sub> @BPN | *CO → *CHO                                                               | 0.53 | CH <sub>3</sub> OH                 |
|                      | *CO → *CHO                                                               | 0.53 | CH <sub>4</sub>                    |
|                      | *CH <sub>3</sub> CH <sub>2</sub> O → *CH <sub>3</sub> CH <sub>2</sub> OH | 0.59 | CH <sub>3</sub> CH <sub>2</sub> OH |

---

**Table S27.** The products and  $U_L$  for CORR on the selected  $\text{Fe}_2@BPN$ ,  $\text{Ni}_2@BPN$ ,  $\text{Cu}_2@BPN$ , and  $\text{Ir}_2@BPN$  in this work and the other systems in previous reports for comparison.

| Systems                   | Products                          | $U_L$ |
|---------------------------|-----------------------------------|-------|
| $\text{Fe}_2@BPN$         | $\text{CH}_4$                     | -0.62 |
| $\text{Ir}_2@BPN$         | $\text{CH}_4$                     | -0.53 |
| $\text{Ni}_2@BPN$         | $\text{CH}_3\text{CH}_2\text{OH}$ | -0.59 |
| $\text{Cu}_2@BPN$         | $\text{CH}_2\text{CH}_2$          | -0.46 |
| $\text{B}_2@Bi^1$         | $\text{CH}_4$                     | -0.57 |
| $\text{Ru}_2@C_2N^2$      | $\text{CH}_4$                     | -0.58 |
| $\text{Mn}_2@Pc^3$        | $\text{CH}_4$                     | -0.84 |
| $\text{Cu} (100)^4$       | $\text{CH}_2\text{CH}_2$          | -0.72 |
| $\text{Cu}_4@C_5N_2H_2^5$ | $\text{CH}_2\text{CH}_2$          | -0.50 |
| $\text{Fe}_2@C_2N^6$      | $\text{CH}_2\text{CH}_2$          | -0.76 |
| $\text{B}@GRY^7$          | $\text{CH}_3\text{CH}_2\text{OH}$ | -0.53 |
| $\text{Cu}_2B_2^8$        | $\text{CH}_3\text{CH}_2\text{OH}$ | -0.59 |
| $\text{Cu}_4@C_2N^9$      | $\text{CH}_3\text{CH}_2\text{OH}$ | -0.81 |

1. Y. Meng, Z. Xu, Z. Shen, Q. Xia, Y. Cao, Y. Wang and X. Li, *Journal of Materials Chemistry A*, 2022, **10**, 6508-6522.
2. X. Cui, W. An, X. Liu, H. Wang, Y. Men and J. Wang, *Nanoscale*, 2018, **10**, 15262-15272.
3. H. Shen, Y. Li and Q. Sun, *The Journal of Physical Chemistry C*, 2017, **121**, 3963-3969.
4. S. Hanselman, M. T. M. Koper and F. Calle-Vallejo, *ACS Energy Letters*, 2018, **3**, 1062-1067.
5. D. Zhang, O. V. Prezhdo and L. Xu, *Journal of the American Chemical Society*, 2023, **145**, 7030-7039.
6. H. Liu, Q. Huang, W. An, Y. Wang, Y. Men and S. Liu, *Journal of Energy Chemistry*, 2021, **61**, 507-516.
7. P. Mano, S. Namuangruk and K. Takahashi, *The Journal of Physical Chemistry C*, 2023, **127**, 7683-7694.
8. J. Jia, H. Zhang, Z. Wang, J. Zhao and Z. Zhou, *Journal of Materials Chemistry A*, 2020, **8**, 9607-9615.
9. Y. Wang, N. Ma, Y. Zhang, B. Liang and J. Fan, *Applied Surface Science*, 2023, **626**.
